# Supplementary material for: Cation⋯cation hydrogen bonds in synephrine salts: a typical interaction in an unusual environment
Source: Royal Society of Chemistry journal article supplement (doi:10.1039/c9cp03164b), 2019-01-01
Supplement: c9cp03164b1.pdf [file c9cp03164b1.pdf]

Electronic supplementary information (ESI)

**Cation□□□Cation Hydrogen Bonds in Synephrine Salts: A Typical Interaction in the Unusual Environment.**

**Sibananda G. Dash and Tejender S. Thakur\***

Molecular and Structural Biology Division, CSIR–Central Drug Research Institute, Sector 10, Jankipuram Extension, Sitapur Road, Lucknow 226 031, INDIA

**E–mail:** tejender.thakur@cdri.res.in

**Table of Contents**

| <b>Sr. No.</b> | <b>Contents</b>                                                                                                       | <b>Page Nos.</b> |
|----------------|-----------------------------------------------------------------------------------------------------------------------|------------------|
| 1              | PXRD pattern of synephrine salts                                                                                      | 2                |
| 2              | Topological parameters of salts ( <b>1b</b> , <b>1e</b> , <b>1h</b> and <b>1k</b> ) obtained from crystal calculation | 3 – 7            |
| 3              | ESPD and AIM charge distribution in gas phase for O–H□□□O dimers                                                      | 7 – 8            |
| 4              | Topological parameters of O–H□□□O dimers obtained from gas phase calculation                                          | 9 – 11           |
| 5              | NBO parameters for O–H□□□O dimers                                                                                     | 11               |
| 6              | Topological parameters of water mediated tetramer obtained from gas phase calculation                                 | 12–13            |
| 7              | NBO parameters for water mediated tetramer                                                                            | 13 – 14          |
| 8              | Plot of interaction energy variation with distance between cationic charge centres                                    | 14               |
| 9              | Crystal packing in synephrine form I and its salts ( <b>1b -1k</b> )                                                  | 14 -17           |

## Electronic supplementary information (ESI)

**Powder X-ray Diffraction (PXRD) analysis:** PXRD data was recorded using Cu-K $\alpha$  radiation over the  $2\theta$  range 5-50 $^\circ$  with a step size of 0.02 $^\circ$  at a scan rate of 2 $^\circ$  min $^{-1}$ .

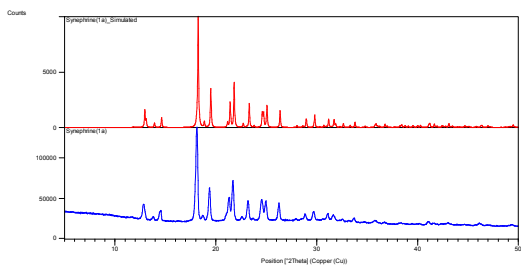

(a)

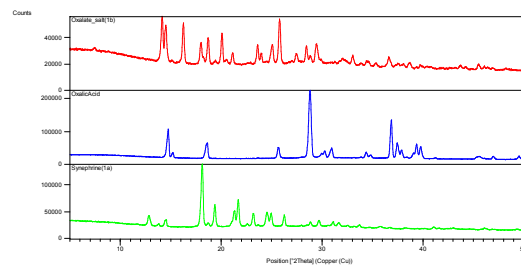

(b)

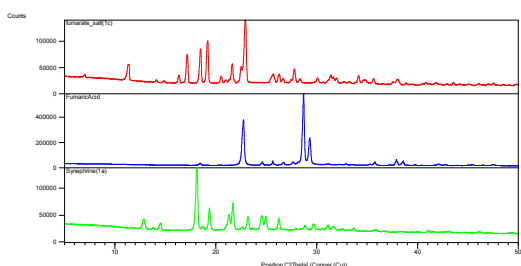

(c)

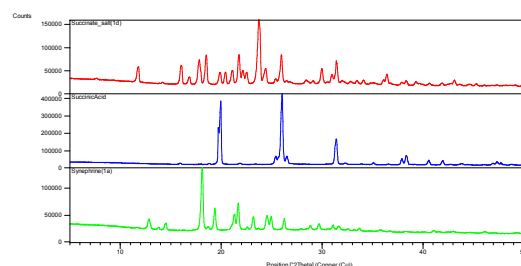

(d)

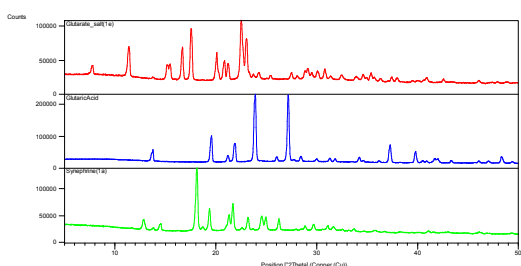

(e)

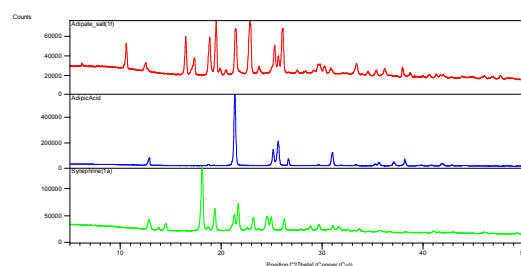

(f)

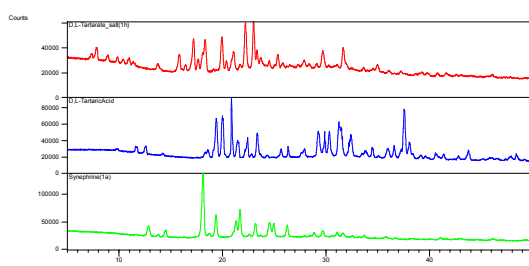

(g)

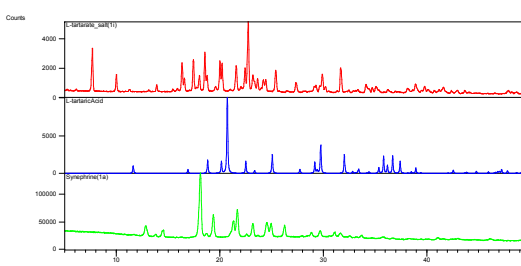

(h)

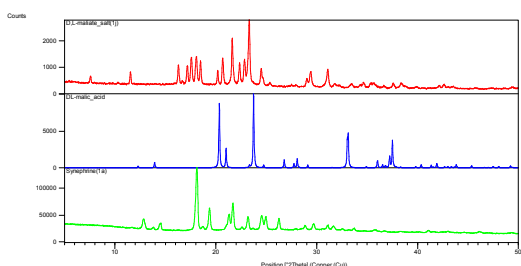

(i)

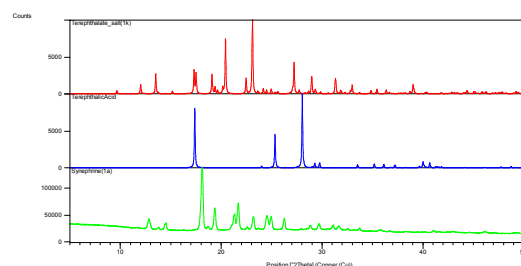

(j)

## Electronic supplementary information (ESI)

**Figure S1** PXRD pattern of (a) Synephrine form I, (b) Oxalate salt, (c) Fumarate salt, (d) Succinate salt, (e) Glutarate salt, (f) Adipate salt, (g) D,L-tartarate salt, (h) L-tartarate salt, (i) DL-malate salt and (j) Terephthalate salt.

**Table S1** BCP analysis of intramolecular interactions in the ( $\pm$ )-*p*-Synephrine–Oxalic acid salt (**1b**).

| Bond   | $\rho$ (eÅ <sup>-3</sup> ) | $\nabla^2\rho$ (eÅ <sup>-5</sup> ) | $\lambda_1$ | $\lambda_2$ | $\lambda_3$ | $\epsilon$ | $R_{ij}$ | $d_1$  | $d_2$  |
|--------|----------------------------|------------------------------------|-------------|-------------|-------------|------------|----------|--------|--------|
| C1–C2  | 2.080                      | -17.583                            | -14.57      | -12.23      | 9.22        | 0.19       | 1.3937   | 0.6829 | 0.7109 |
| C1–C6  | 2.072                      | -17.547                            | -14.48      | -12.30      | 9.23        | 0.18       | 1.3949   | 0.7102 | 0.6847 |
| C1–C7  | 1.718                      | -13.009                            | -11.45      | -11.27      | 9.71        | 0.02       | 1.5180   | 0.7602 | 0.7578 |
| C2–C3  | 2.069                      | -17.381                            | -14.46      | -12.28      | 9.36        | 0.18       | 1.3930   | 0.7027 | 0.6904 |
| C2–H2  | 1.816                      | -16.564                            | -16.51      | -16.19      | 16.14       | 0.02       | 1.0886   | 0.7023 | 0.3863 |
| C3–C4  | 2.096                      | -18.121                            | -14.94      | -12.27      | 9.09        | 0.22       | 1.3971   | 0.6682 | 0.7289 |
| C3–H3  | 1.826                      | -16.998                            | -16.60      | -16.30      | 15.91       | 0.02       | 1.0874   | 0.7004 | 0.387  |
| C4–C5  | 2.127                      | -19.265                            | -15.38      | -12.76      | 8.88        | 0.21       | 1.3913   | 0.7140 | 0.6773 |
| C5–C6  | 2.086                      | -17.568                            | -14.63      | -12.22      | 9.29        | 0.20       | 1.3876   | 0.6896 | 0.698  |
| C5–H5  | 1.808                      | -16.341                            | -16.42      | -16.03      | 16.12       | 0.02       | 1.0867   | 0.7022 | 0.3845 |
| C6–H6  | 1.841                      | -17.787                            | -17.26      | -16.85      | 16.32       | 0.02       | 1.0869   | 0.7139 | 0.3730 |
| C7–C8  | 1.773                      | -14.481                            | -12.24      | -11.77      | 9.52        | 0.04       | 1.5135   | 0.7417 | 0.7718 |
| C7–H7  | 1.822                      | -16.976                            | -16.79      | -16.00      | 15.82       | 0.05       | 1.1033   | 0.7117 | 0.3916 |
| C8–H8A | 1.865                      | -18.965                            | -17.76      | -17.18      | 15.98       | 0.03       | 1.0918   | 0.7208 | 0.3710 |
| C8–H8B | 1.855                      | -18.565                            | -17.34      | -17.19      | 15.97       | 0.01       | 1.0931   | 0.7191 | 0.3741 |
| C9–H9A | 1.867                      | -18.803                            | -17.65      | -16.97      | 15.82       | 0.04       | 1.0922   | 0.7121 | 0.3801 |
| C9–H9B | 1.906                      | -19.882                            | -17.77      | -17.53      | 15.42       | 0.01       | 1.0904   | 0.702  | 0.3885 |
| C9–H9C | 1.857                      | -18.812                            | -17.73      | -16.95      | 15.87       | 0.05       | 1.0913   | 0.7159 | 0.3755 |
| N3–C8  | 1.655                      | -11.013                            | -11.20      | -10.88      | 11.07       | 0.03       | 1.4914   | 0.8755 | 0.6159 |
| N3–C9  | 1.682                      | -11.500                            | -11.57      | -11.15      | 11.22       | 0.04       | 1.4863   | 0.867  | 0.6193 |
| N3–H3A | 2.032                      | -28.027                            | -27.26      | -27.15      | 26.39       | 0.00       | 1.0410   | 0.7946 | 0.2464 |
| N3–H3B | 1.991                      | -26.403                            | -26.56      | -26.43      | 26.59       | 0.01       | 1.0507   | 0.8048 | 0.2459 |
| O1–C4  | 1.942                      | -16.186                            | -14.08      | -13.42      | 11.31       | 0.05       | 1.3735   | 0.8397 | 0.5338 |
| O1–H1A | 1.922                      | -19.313                            | -28.60      | -27.70      | 36.99       | 0.03       | 1.0141   | 0.7771 | 0.2370 |
| O2–C7  | 1.786                      | -12.572                            | -12.98      | -12.35      | 12.75       | 0.05       | 1.4253   | 0.8425 | 0.5827 |
| O2–H2A | 2.237                      | -29.700                            | -34.82      | -33.85      | 38.98       | 0.03       | 0.9738   | 0.7452 | 0.2285 |
| O3–C10 | 2.527                      | -20.044                            | -21.22      | -20.93      | 22.10       | 0.01       | 1.2564   | 0.8245 | 0.4319 |
| O4–C10 | 2.492                      | -18.374                            | -20.74      | -19.62      | 21.98       | 0.06       | 1.2558   | 0.8224 | 0.4334 |

**Table S2** BCP analysis of intramolecular interactions in the ( $\pm$ )-*p*-Synephrine–Glutaric acid salt (**1e**).

| Bond  | $\rho$ (eÅ <sup>-3</sup> ) | $\nabla^2\rho$ (eÅ <sup>-5</sup> ) | $\lambda_1$ | $\lambda_2$ | $\lambda_3$ | $\epsilon$ | $R_{ij}$ | $d_1$  | $d_2$  |
|-------|----------------------------|------------------------------------|-------------|-------------|-------------|------------|----------|--------|--------|
| C1–C2 | 2.06                       | -16.86                             | -14.67      | -12.08      | 9.89        | 0.21       | 1.3972   | 0.6933 | 0.7039 |
| C1–C6 | 2.10                       | -17.69                             | -15.01      | -12.45      | 9.76        | 0.21       | 1.3920   | 0.6893 | 0.7027 |
| C1–C7 | 1.70                       | -11.57                             | -11.60      | -10.71      | 10.74       | 0.08       | 1.5158   | 0.7450 | 0.7708 |
| C2–C3 | 2.08                       | -17.25                             | -14.63      | -12.35      | 9.74        | 0.18       | 1.3905   | 0.6898 | 0.7007 |
| C2–H2 | 1.89                       | -20.25                             | -16.61      | -16.20      | 12.56       | 0.02       | 1.0860   | 0.6796 | 0.4064 |
| C3–C4 | 2.14                       | -19.70                             | -15.88      | -13.07      | 9.25        | 0.22       | 1.3919   | 0.6704 | 0.7215 |

Electronic supplementary information (ESI)

|          |      |        |        |        |       |      |        |        |        |
|----------|------|--------|--------|--------|-------|------|--------|--------|--------|
| C3–H3    | 1.86 | -19.69 | -16.36 | -15.83 | 12.50 | 0.03 | 1.0871 | 0.6796 | 0.4075 |
| C4–C5    | 2.12 | -18.70 | -15.55 | -12.60 | 9.45  | 0.23 | 1.3935 | 0.7196 | 0.6740 |
| C5–C6    | 2.09 | -17.46 | -14.93 | -12.22 | 9.70  | 0.22 | 1.3850 | 0.6909 | 0.6941 |
| C5–H5    | 1.84 | -18.93 | -16.02 | -15.72 | 12.81 | 0.02 | 1.0863 | 0.6816 | 0.4047 |
| C6–H6    | 1.85 | -19.40 | -16.29 | -16.12 | 13.01 | 0.01 | 1.0909 | 0.6921 | 0.3988 |
| C7–C8    | 1.63 | -11.43 | -11.03 | -10.78 | 10.37 | 0.02 | 1.5187 | 0.7749 | 0.7438 |
| C7–H7    | 1.82 | -18.93 | -16.47 | -15.90 | 13.43 | 0.04 | 1.1056 | 0.7063 | 0.3993 |
| C8–H8A   | 1.91 | -21.90 | -17.81 | -17.04 | 12.96 | 0.05 | 1.0937 | 0.7031 | 0.3907 |
| C8–H8B   | 1.89 | -21.38 | -17.66 | -16.87 | 13.15 | 0.05 | 1.0941 | 0.7023 | 0.3918 |
| C9–H9A   | 1.90 | -21.90 | -17.83 | -17.27 | 13.20 | 0.03 | 1.0915 | 0.7084 | 0.3831 |
| C9–H9B   | 1.88 | -21.21 | -17.59 | -16.91 | 13.29 | 0.04 | 1.0922 | 0.7069 | 0.3853 |
| C9–H9C   | 1.92 | -22.03 | -18.07 | -17.52 | 13.56 | 0.03 | 1.0934 | 0.7147 | 0.3787 |
| C10–C11  | 1.73 | -13.26 | -12.19 | -11.54 | 10.47 | 0.06 | 1.5218 | 0.7562 | 0.7656 |
| C11–C12  | 1.66 | -11.14 | -10.92 | -10.85 | 10.62 | 0.01 | 1.5186 | 0.7519 | 0.7668 |
| C11–H11A | 1.84 | -19.90 | -16.42 | -16.13 | 12.65 | 0.02 | 1.0990 | 0.6960 | 0.4030 |
| C11–H11B | 1.83 | -19.25 | -16.23 | -16.14 | 13.12 | 0.01 | 1.0974 | 0.6975 | 0.3998 |
| C12–C11  | 1.73 | -13.81 | -12.07 | -11.31 | 9.57  | 0.07 | 1.5233 | 0.8012 | 0.7221 |
| C12–H12  | 1.84 | -20.47 | -16.72 | -16.36 | 12.61 | 0.02 | 1.0914 | 0.6857 | 0.4057 |
| N3–C8    | 1.65 | -11.34 | -11.47 | -11.15 | 11.27 | 0.03 | 1.4919 | 0.8764 | 0.6155 |
| N3–C9    | 1.62 | -10.46 | -10.94 | -10.79 | 11.27 | 0.01 | 1.4898 | 0.8773 | 0.6124 |
| N3–H3A   | 2.06 | -32.87 | -27.90 | -27.75 | 22.78 | 0.01 | 1.0399 | 0.8016 | 0.2383 |
| N3–H3B   | 2.10 | -34.83 | -28.48 | -28.35 | 22.01 | 0.00 | 1.0425 | 0.7974 | 0.2451 |
| O1–C4    | 2.04 | -19.43 | -15.78 | -15.39 | 11.74 | 0.03 | 1.3640 | 0.8257 | 0.5383 |
| O1–H1A   | 2.17 | -43.45 | -36.57 | -35.96 | 29.08 | 0.02 | 0.9921 | 0.7844 | 0.2077 |
| O2–C7    | 1.81 | -11.59 | -14.02 | -12.72 | 15.14 | 0.10 | 1.4248 | 0.8216 | 0.6031 |
| O2–H2A   | 2.20 | -40.98 | -35.70 | -35.09 | 29.81 | 0.02 | 0.9940 | 0.7772 | 0.2168 |
| O3–C10   | 2.49 | -19.06 | -21.02 | -20.19 | 22.15 | 0.04 | 1.2662 | 0.8361 | 0.4301 |
| O4–C10   | 2.54 | -20.81 | -21.59 | -21.30 | 22.08 | 0.01 | 1.2607 | 0.8313 | 0.4294 |

**Table S3** BCP analysis of intramolecular interactions in the ( $\pm$ )-*p*-Synephrine-D,L-Tartaric acid salt (**1h**).

| Bond    | $\rho$ ( $\text{e}\text{\AA}^{-3}$ ) | $\nabla^2\rho$ ( $\text{e}\text{\AA}^{-5}$ ) | $\lambda_1$ | $\lambda_2$ | $\lambda_3$ | $\epsilon$ | $R_{ij}$ | $d_1$  | $d_2$  |
|---------|--------------------------------------|----------------------------------------------|-------------|-------------|-------------|------------|----------|--------|--------|
| C1–C2   | 2.113                                | -18.345                                      | -15.30      | -12.60      | 9.55        | 0.21       | 1.3889   | 0.6864 | 0.7025 |
| C1–C6   | 2.075                                | -17.672                                      | -14.83      | -12.44      | 9.60        | 0.19       | 1.3928   | 0.6927 | 0.7001 |
| C1–C7   | 1.729                                | -13.017                                      | -11.79      | -11.21      | 9.99        | 0.05       | 1.5213   | 0.7451 | 0.7762 |
| C2–C3   | 2.066                                | -16.594                                      | -14.61      | -11.96      | 9.98        | 0.22       | 1.3952   | 0.6926 | 0.7026 |
| C2–H2   | 1.913                                | -22.585                                      | -17.37      | -16.68      | 11.47       | 0.04       | 1.0860   | 0.6804 | 0.4056 |
| C3–C4   | 2.117                                | -18.342                                      | -15.11      | -12.46      | 9.22        | 0.21       | 1.3916   | 0.6503 | 0.7413 |
| C3–H3   | 1.860                                | -19.066                                      | -16.36      | -15.64      | 12.93       | 0.05       | 1.0870   | 0.6858 | 0.4012 |
| C4–C5   | 2.122                                | -18.246                                      | -14.98      | -12.50      | 9.23        | 0.20       | 1.3916   | 0.7429 | 0.6488 |
| C5–C6   | 2.103                                | -18.122                                      | -15.10      | -12.56      | 9.55        | 0.20       | 1.3857   | 0.6815 | 0.7042 |
| C5–H5   | 1.902                                | -20.729                                      | -16.17      | -16.13      | 11.58       | 0.00       | 1.0868   | 0.6686 | 0.4182 |
| C6–H6   | 1.831                                | -18.569                                      | -15.57      | -15.46      | 12.46       | 0.01       | 1.0900   | 0.6789 | 0.4111 |
| C7–C8   | 1.740                                | -14.353                                      | -12.09      | -11.64      | 9.38        | 0.04       | 1.5233   | 0.748  | 0.7753 |
| C7–H7   | 1.935                                | -23.339                                      | -17.51      | -16.98      | 11.15       | 0.03       | 1.1027   | 0.6915 | 0.4112 |
| C8–H8A  | 1.887                                | -22.182                                      | -17.63      | -16.87      | 12.32       | 0.05       | 1.0950   | 0.7115 | 0.3835 |
| C8–H8B  | 1.927                                | -22.809                                      | -17.66      | -16.97      | 11.82       | 0.04       | 1.0928   | 0.6960 | 0.3968 |
| C9–H9A  | 1.880                                | -21.646                                      | -17.58      | -16.49      | 12.42       | 0.07       | 1.0906   | 0.7050 | 0.3856 |
| C9–H9B  | 1.938                                | -24.215                                      | -18.40      | -17.50      | 11.68       | 0.05       | 1.0908   | 0.7073 | 0.3835 |
| C9–H9C  | 1.903                                | -22.415                                      | -18.10      | -17.01      | 12.69       | 0.06       | 1.0911   | 0.7205 | 0.3706 |
| C10–C11 | 2.083                                | -18.387                                      | -15.22      | -12.59      | 9.420       | 0.21       | 1.3935   | 0.6976 | 0.6960 |

Electronic supplementary information (ESI)

|          |       |         |        |        |       |      |        |        |        |
|----------|-------|---------|--------|--------|-------|------|--------|--------|--------|
| C10–C15  | 2.102 | -18.829 | -15.32 | -12.86 | 9.35  | 0.19 | 1.3905 | 0.7077 | 0.6828 |
| C10–C16  | 1.725 | -13.024 | -11.85 | -10.98 | 9.81  | 0.08 | 1.5175 | 0.7441 | 0.7733 |
| C11–C12  | 2.097 | -18.42  | -15.12 | -12.71 | 9.42  | 0.19 | 1.3901 | 0.6836 | 0.7065 |
| C11–H11  | 1.887 | -21.673 | -17.10 | -16.59 | 12.02 | 0.03 | 1.0882 | 0.6903 | 0.3979 |
| C12–C13  | 2.133 | -19.939 | -15.70 | -13.24 | 9.00  | 0.19 | 1.3921 | 0.6677 | 0.7245 |
| C12–H12  | 1.853 | -19.352 | -16.23 | -15.71 | 12.59 | 0.03 | 1.0870 | 0.6866 | 0.4004 |
| C13–C14  | 2.098 | -18.522 | -15.39 | -12.47 | 9.33  | 0.23 | 1.3905 | 0.7135 | 0.6770 |
| C14–C15  | 2.073 | -18.225 | -14.75 | -12.95 | 9.47  | 0.14 | 1.3916 | 0.6873 | 0.7043 |
| C14–H14  | 1.854 | -18.834 | -16.21 | -15.33 | 12.7  | 0.06 | 1.0867 | 0.6819 | 0.4048 |
| C15–H15  | 1.920 | -22.636 | -16.92 | -16.74 | 11.02 | 0.01 | 1.0888 | 0.6719 | 0.4169 |
| C16–C17  | 1.767 | -16.093 | -12.98 | -11.9  | 8.78  | 0.09 | 1.5215 | 0.7547 | 0.7668 |
| C16–H16  | 1.938 | -24.488 | -18.35 | -17.47 | 11.33 | 0.05 | 1.1009 | 0.7092 | 0.3917 |
| C17–H17A | 1.892 | -22.913 | -17.73 | -17.34 | 12.16 | 0.02 | 1.0941 | 0.7166 | 0.3775 |
| C17–H17B | 1.949 | -25.627 | -18.85 | -17.84 | 11.07 | 0.06 | 1.0917 | 0.7089 | 0.3828 |
| C18–H18A | 1.767 | -18.21  | -17.36 | -16.66 | 15.81 | 0.04 | 1.0927 | 0.7714 | 0.3213 |
| C18–H18B | 1.782 | -18.661 | -17.28 | -17.15 | 15.77 | 0.01 | 1.0918 | 0.7735 | 0.3183 |
| C18–H18C | 1.879 | -21.759 | -17.75 | -16.94 | 12.93 | 0.05 | 1.0909 | 0.7152 | 0.3757 |
| C19–C20  | 1.700 | -13.558 | -12.44 | -10.88 | 9.76  | 0.14 | 1.5498 | 0.7877 | 0.7621 |
| C20–C21  | 1.780 | -15.931 | -12.92 | -12.27 | 9.26  | 0.05 | 1.5302 | 0.7659 | 0.7643 |
| C20–H20  | 1.894 | -21.698 | -17.00 | -16.25 | 11.55 | 0.05 | 1.0991 | 0.6891 | 0.4099 |
| C21–C22  | 1.703 | -13.069 | -12.04 | -11.03 | 10.01 | 0.09 | 1.5497 | 0.7785 | 0.7713 |
| C21–H21  | 1.880 | -21.567 | -17.28 | -16.37 | 12.09 | 0.06 | 1.1003 | 0.7018 | 0.3985 |
| N3–C8    | 1.656 | -7.944  | -11.55 | -11.42 | 15.03 | 0.01 | 1.4864 | 0.7922 | 0.6941 |
| N3–C9    | 1.653 | -7.748  | -11.49 | -11.22 | 14.96 | 0.02 | 1.4844 | 0.7933 | 0.6911 |
| N3–H3A   | 2.210 | -28.64  | -25.38 | -25.31 | 22.04 | 0.00 | 1.0375 | 0.7177 | 0.3198 |
| N3–H3B   | 2.108 | -24.664 | -23.76 | -23.65 | 22.75 | 0.00 | 1.0412 | 0.7213 | 0.3200 |
| N6–C17   | 1.611 | -7.038  | -11.14 | -10.86 | 14.96 | 0.03 | 1.4964 | 0.7967 | 0.6997 |
| N6–C18   | 1.599 | -6.631  | -11.19 | -10.82 | 15.38 | 0.03 | 1.4913 | 0.7940 | 0.6973 |
| N6–H6A   | 2.149 | -24.221 | -23.95 | -23.75 | 23.48 | 0.01 | 1.0315 | 0.7140 | 0.3175 |
| N6–H6B   | 2.100 | -23.421 | -23.15 | -22.92 | 22.65 | 0.01 | 1.0419 | 0.7208 | 0.3211 |
| O1–C4    | 2.005 | -19.504 | -16.08 | -14.42 | 10.99 | 0.12 | 1.3700 | 0.8370 | 0.5329 |
| O1–H1A   | 2.023 | -42.270 | -34.50 | -33.95 | 26.18 | 0.02 | 1.0123 | 0.8066 | 0.2058 |
| O2–C7    | 1.888 | -15.825 | -15.12 | -13.51 | 12.8  | 0.12 | 1.4138 | 0.8298 | 0.5840 |
| O2–H2A   | 2.233 | -46.026 | -37.78 | -36.97 | 28.73 | 0.02 | 0.9840 | 0.7801 | 0.2039 |
| O4–C13   | 1.992 | -18.446 | -15.51 | -14.17 | 11.23 | 0.09 | 1.3651 | 0.8354 | 0.5297 |
| O4–H4A   | 2.046 | -41.574 | -35.46 | -34.74 | 28.63 | 0.02 | 0.9963 | 0.8033 | 0.1930 |
| O5–C16   | 1.788 | -13.261 | -13.76 | -12.02 | 12.51 | 0.15 | 1.4236 | 0.8396 | 0.5840 |
| O5–H5A   | 2.383 | -60.249 | -42.19 | -41.57 | 23.50 | 0.01 | 0.9829 | 0.7781 | 0.2049 |
| O7–C19   | 2.621 | -27.584 | -22.69 | -21.09 | 16.19 | 0.08 | 1.2500 | 0.8033 | 0.4467 |
| O8–C19   | 2.559 | -27.031 | -22.15 | -20.87 | 15.99 | 0.06 | 1.2585 | 0.8109 | 0.4476 |
| O9–C20   | 1.806 | -13.501 | -13.92 | -12.71 | 13.13 | 0.09 | 1.4172 | 0.8332 | 0.5840 |
| O9–H9    | 2.288 | -41.700 | -36.72 | -36.30 | 31.32 | 0.01 | 0.9718 | 0.7623 | 0.2095 |
| O10–C21  | 1.809 | -13.878 | -13.81 | -13.03 | 12.96 | 0.06 | 1.4210 | 0.8341 | 0.5870 |
| O10–H10  | 2.390 | -50.400 | -39.56 | -38.77 | 27.93 | 0.02 | 0.9730 | 0.7633 | 0.2097 |
| O11–C22  | 2.539 | -28.417 | -21.31 | -19.34 | 12.24 | 0.10 | 1.2672 | 0.8000 | 0.4672 |
| O12–C22  | 2.690 | -28.459 | -23.57 | -22.29 | 17.4  | 0.06 | 1.2379 | 0.7963 | 0.4416 |

**Table S4** BCP analysis of intramolecular interactions in the ( $\pm$ )-*p*-Synephrine–Terephthalate salt hydrate, (**1k**).

| Bond  | $\rho$ (eÅ <sup>-3</sup> ) | $\nabla^2\rho$ (eÅ <sup>-5</sup> ) | $\lambda_1$ | $\lambda_2$ | $\lambda_3$ | $\epsilon$ | $R_{ij}$ | $d_1$  | $d_2$  |
|-------|----------------------------|------------------------------------|-------------|-------------|-------------|------------|----------|--------|--------|
| C1–C2 | 2.09                       | -17.74                             | -14.98      | -12.59      | 9.83        | 0.19       | 1.3897   | 0.6794 | 0.7103 |

Electronic supplementary information (ESI)

|         |      |        |        |        |       |      |        |        |        |
|---------|------|--------|--------|--------|-------|------|--------|--------|--------|
| C1–C6   | 2.12 | -18.00 | -15.14 | -12.72 | 9.85  | 0.19 | 1.3863 | 0.6867 | 0.6996 |
| C1–C7   | 1.70 | -12.11 | -11.66 | -10.79 | 10.34 | 0.08 | 1.5185 | 0.7432 | 0.7753 |
| C2–C3   | 2.14 | -18.62 | -15.55 | -12.63 | 9.56  | 0.23 | 1.3728 | 0.6923 | 0.6806 |
| C2–H2   | 1.87 | -19.61 | -17.06 | -16.66 | 14.12 | 0.02 | 1.0891 | 0.7020 | 0.3871 |
| C3–C4   | 2.16 | -19.80 | -16.09 | -13.08 | 9.36  | 0.23 | 1.3876 | 0.6652 | 0.7225 |
| C3–H3   | 1.86 | -20.06 | -16.84 | -16.33 | 13.11 | 0.03 | 1.0890 | 0.6889 | 0.4001 |
| C4–C5   | 2.17 | -19.98 | -16.21 | -13.1  | 9.33  | 0.24 | 1.3795 | 0.7037 | 0.6758 |
| C5–C6   | 2.09 | -17.84 | -14.89 | -12.7  | 9.76  | 0.17 | 1.3899 | 0.6941 | 0.6958 |
| C5–H5   | 1.82 | -18.79 | -16.59 | -16.09 | 13.89 | 0.03 | 1.0890 | 0.7018 | 0.3871 |
| C6–H6   | 1.89 | -20.70 | -17.05 | -16.79 | 13.15 | 0.02 | 1.0890 | 0.6885 | 0.4005 |
| C7–C8   | 1.77 | -14.46 | -12.4  | -11.95 | 9.88  | 0.04 | 1.5131 | 0.7478 | 0.7652 |
| C7–H7   | 1.95 | -22.92 | -18.48 | -17.52 | 13.08 | 0.05 | 1.0891 | 0.7032 | 0.3859 |
| C8–H8A  | 1.89 | -20.80 | -17.52 | -16.69 | 13.41 | 0.05 | 1.0890 | 0.7010 | 0.3879 |
| C8–H8B  | 1.89 | -20.72 | -17.41 | -16.97 | 13.66 | 0.03 | 1.0890 | 0.7048 | 0.3842 |
| C9–H9A  | 1.90 | -21.53 | -17.72 | -17    | 13.19 | 0.04 | 1.0891 | 0.7017 | 0.3874 |
| C9–H9B  | 1.88 | -20.69 | -17.33 | -16.65 | 13.29 | 0.04 | 1.0891 | 0.6979 | 0.3912 |
| C9–H9C  | 1.94 | -23.20 | -18.32 | -17.91 | 13.04 | 0.02 | 1.0892 | 0.7085 | 0.3806 |
| C10–C11 | 2.08 | -17.06 | -14.7  | -12.45 | 10.1  | 0.18 | 1.3909 | 0.6940 | 0.6970 |
| C10–C14 | 1.72 | -13.12 | -12.31 | -11.16 | 10.36 | 0.1  | 1.5136 | 0.7426 | 0.7711 |
| C11–H11 | 1.88 | -19.84 | -16.8  | -16.66 | 13.62 | 0.01 | 1.0881 | 0.6951 | 0.3930 |
| C11–C12 | 2.10 | -17.83 | -15.07 | -12.73 | 9.96  | 0.18 | 1.3893 | 0.7045 | 0.6847 |
| C12–H12 | 1.87 | -19.83 | -17.02 | -16.55 | 13.75 | 0.03 | 1.0868 | 0.6964 | 0.3904 |
| C12–C13 | 2.12 | -17.87 | -15.3  | -12.55 | 9.98  | 0.22 | 1.3899 | 0.6920 | 0.6979 |
| C13–C15 | 1.75 | -13.99 | -12.81 | -11.41 | 10.23 | 0.12 | 1.5055 | 0.7383 | 0.7671 |
| N3–C8   | 1.67 | -10.89 | -11.61 | -11.27 | 11.99 | 0.03 | 1.4876 | 0.8582 | 0.6294 |
| N3–C9   | 1.66 | -10.83 | -11.36 | -11.1  | 11.63 | 0.02 | 1.4835 | 0.8635 | 0.6201 |
| N3–H3A  | 2.23 | -41.19 | -32.46 | -32.17 | 23.44 | 0.01 | 1.0150 | 0.7851 | 0.2299 |
| N3–H3B  | 2.25 | -42.73 | -32.49 | -32.35 | 22.11 | 0.00 | 1.0150 | 0.7795 | 0.2355 |
| O1–C4   | 2.04 | -19.09 | -16.07 | -14.78 | 11.76 | 0.09 | 1.3625 | 0.8243 | 0.5382 |
| O1–H1A  | 2.20 | -41.49 | -36.16 | -35.62 | 30.29 | 0.02 | 0.9932 | 0.7769 | 0.2163 |
| O2–C7   | 1.79 | -12.88 | -13.77 | -12.44 | 13.33 | 0.11 | 1.4261 | 0.8359 | 0.5902 |
| O2–H2A  | 2.25 | -41.04 | -35.84 | -35.15 | 29.95 | 0.02 | 0.9929 | 0.7670 | 0.2259 |
| O4–C14  | 2.62 | -29.96 | -24.1  | -18.82 | 12.96 | 0.28 | 1.2575 | 0.7982 | 0.4593 |
| O5–C15  | 2.61 | -29.73 | -24.05 | -19.02 | 13.34 | 0.26 | 1.2625 | 0.8050 | 0.4575 |
| O6–H6A  | 2.19 | -38.61 | -35.22 | -34.77 | 31.37 | 0.01 | 0.9878 | 0.7700 | 0.2177 |
| O6–H6B  | 2.20 | -38.99 | -35.21 | -34.84 | 31.06 | 0.01 | 0.9866 | 0.7686 | 0.2180 |

**Table S5** Bond Critical Point Analysis of Intermolecular Interactions Observed in Synephrine–Salt Forms (**1b**, **1e**, **1h**, and **1k**).

| Form      | Molecular Pair | Interaction        | r (Å)       | d (Å)       | D (Å)       | $\theta$ (°) | $\rho$ (eÅ <sup>-3</sup> ) | $\nabla^2\rho$ (eÅ <sup>-5</sup> ) | $\epsilon$  | $ V_b /G_b$ | Symm. Code          |
|-----------|----------------|--------------------|-------------|-------------|-------------|--------------|----------------------------|------------------------------------|-------------|-------------|---------------------|
| <b>1b</b> | Cat...Ani      | O1–H1A...O3        | 1.01        | 1.60        | 2.61        | 173          | 0.34                       | 5.42                               | 0.01        | 1.03        | 1–x, 1/2+y, 1/2–z   |
|           | Cat...Ani      | N3–H3B...O4        | 1.05        | 1.73        | 2.76        | 164          | 0.26                       | 3.99                               | 0.01        | 0.96        | –x, –y, –z          |
|           | Cat...Ani      | N3–H3A...O4        | 1.04        | 1.82        | 2.82        | 158          | 0.20                       | 3.20                               | 0.03        | 0.90        | x, 1+y, z           |
|           | Cat...Cat      | <b>O2–H2A...O1</b> | <b>0.97</b> | <b>1.84</b> | <b>2.81</b> | <b>175</b>   | <b>0.16</b>                | <b>3.42</b>                        | <b>0.00</b> | <b>0.80</b> | <b>1–x, 1–y, –z</b> |
|           | Cat...Ani      | N3–H3B...O3        | 1.05        | 2.38        | 2.97        | 115          | 0.08                       | 1.18                               | 0.14        | 0.71        | x, y, z             |
|           | Cat...Ani      | C8–H8A...O3        | 1.09        | 2.49        | 3.14        | 117          | 0.06                       | 0.94                               | 0.08        | 0.80        | x, y, z             |

Electronic supplementary information (ESI)

|           |             |                |      |      |      |      |      |      |      |           |                      |
|-----------|-------------|----------------|------|------|------|------|------|------|------|-----------|----------------------|
|           | Cat...Cat   | C8-H8B...O1    | 1.09 | 2.51 | 3.40 | 137  | 0.06 | 0.84 | 0.45 | 0.60      | 1-x, 1/2+y, 1/2-z    |
|           | Cat...Ani   | C5-H5...O3     | 1.09 | 2.58 | 3.30 | 124  | 0.05 | 0.77 | 1.01 | 0.75      | 1-x, 1/2+y, 1/2-z    |
|           | Cat...Ani   | C9-H9B...O3    | 1.09 | 2.58 | 3.23 | 117  | 0.05 | 0.79 | 0.21 | 0.75      | x, y, z              |
|           | Cat...Ani   | C9-H9A...O1    | 1.09 | 2.64 | 3.48 | 133  | 0.04 | 0.59 | 0.13 | 0.67      | 1-x, 1/2+y, 1/2-z    |
| 1e        | Cat...Ani   | O2-H2A...O3    | 0.99 | 1.66 | 2.64 | 167  | 0.35 | 2.60 | 0.02 | 1.35      | 1/2+x, 1/2+y, z      |
|           | Cat...Ani   | O1-H1A...O3    | 0.99 | 1.68 | 2.66 | 171  | 0.34 | 2.31 | 0.01 | 1.29      | 1/2-x, -1/2-y, 1-z   |
|           | Cat...Ani   | N3-H3B...O4    | 1.04 | 1.77 | 2.80 | 168  | 0.28 | 2.46 | 0.02 | 1.19      | 1/2+x, -1/2+y, z     |
|           | Cat...Ani   | N3-H3A...O4    | 1.04 | 1.85 | 2.85 | 160  | 0.22 | 2.48 | 0.05 | 1.06      | -x, y, 1/2-z         |
|           | Cat...Cat   | C9-H9A...O1    | 1.09 | 2.26 | 3.32 | 162  | 0.10 | 1.09 | 0.01 | 0.86      | 1/2-x, -1/2-y, 1-z   |
|           | Cat...Cat   | C9-H9C...O2    | 1.09 | 2.42 | 3.47 | 161  | 0.07 | 0.75 | 0.03 | 1.00      | x, -1+y, z           |
|           | Cat...Ani   | C11-H11A...O1  | 1.10 | 2.46 | 3.37 | 140  | 0.06 | 0.79 | 0.20 | 0.75      | 1/2-x, 1/2-y, 1-z    |
|           | Cat...Ani   | C9-H9B...O3    | 1.09 | 2.71 | 3.58 | 137  | 0.04 | 0.51 | 0.40 | 0.67      | -x, y, 1/2-z         |
|           | Cat...Ani   | O1-H1A...O11   | 1.01 | 1.59 | 2.59 | 169  | 0.42 | 1.91 | 0.01 | 1.54      | x, 1+y, z            |
|           | Cat...Ani   | O4-H4A...O8    | 1.00 | 1.63 | 2.61 | 168  | 0.35 | 3.38 | 0.01 | 1.21      | -x, 2-y, 1-z         |
| 1h        | Cat...Ani   | N3-H3B...O7    | 1.04 | 1.72 | 2.76 | 170  | 0.30 | 1.86 | 0.03 | 1.30      | x, y, z              |
|           | Cat...Ani   | N3-H3A...O12   | 1.04 | 1.72 | 2.71 | 157  | 0.30 | 1.76 | 0.11 | 1.37      | 1+x, y, z            |
|           | Cat...Ani   | O2-H2A...O11   | 0.98 | 1.79 | 2.77 | 169  | 0.28 | 1.73 | 0.01 | 1.28      | -x, 1-y, 2-z         |
|           | Cat...Ani   | O5-H5A...O8    | 0.98 | 1.81 | 2.79 | 177  | 0.27 | 0.59 | 0.01 | 1.67      | x, y, z              |
|           | Cat...Ani   | O9-H9...O1     | 0.97 | 1.83 | 2.80 | 177  | 0.23 | 2.30 | 0.01 | 1.11      | -x, 2-y, 2-z         |
|           | Cat...Ani   | N6-H6B...O7    | 1.04 | 1.80 | 2.78 | 155  | 0.22 | 2.65 | 0.09 | 1.00      | 1-x, 1-y, 1-z        |
|           | Cat...Ani   | O10-H0...O4    | 0.97 | 1.84 | 2.78 | 162  | 0.19 | 2.52 | 0.07 | 0.94      | x, -1+y, z           |
|           | Cat...Ani   | N6-H6A...O1    | 1.03 | 2.07 | 3.02 | 152  | 0.14 | 1.26 | 0.16 | 1.00      | 1-x, 2-y, 1-z        |
|           | Cat...Cat   | C9-H9A...O4    | 1.09 | 2.32 | 3.33 | 154  | 0.10 | 1.04 | 0.04 | 1.00      | 1-x, 2-y, 1-z        |
|           | Cat...Cat   | C9-H9C...O5    | 1.09 | 2.33 | 3.32 | 150  | 0.09 | 1.06 | 0.17 | 0.94      | x, y, z              |
|           | Cat...Ani   | C18-H18A...O12 | 1.09 | 2.36 | 3.45 | 179  | 0.07 | 1.13 | 0.02 | 0.83      | -x, 1-y, 1-z         |
|           | Cat...Cat   | C18-H18C...O2  | 1.09 | 2.50 | 3.20 | 121  | 0.06 | 0.90 | 0.23 | 0.80      | x, y, -1+z           |
|           | Cat...Ani   | N6-H6A...O9    | 1.03 | 2.43 | 3.01 | 115  | 0.05 | 1.19 | 2.30 | 0.67      | 1-x, 1-y, 1-z        |
|           | Cat...Cat   | N6-H6A...O10   | 1.03 | 2.40 | 2.95 | 112  | 0.05 | 1.31 | 1.53 | 0.57      | 1-x, 1-y, 1-z        |
|           | Cat...Ani   | C16-H16...O11  | 1.10 | 2.73 | 3.79 | 162  | 0.05 | 0.52 | 0.93 | 0.67      | x, 1+y, z            |
|           | Cat...Ani   | C9-H9B...O8    | 1.09 | 2.55 | 3.58 | 156  | 0.05 | 0.60 | 0.35 | 0.67      | 1-x, 1-y, 1-z        |
|           | Cat...Ani   | C16-H16...O12  | 1.10 | 2.65 | 3.60 | 144  | 0.05 | 0.64 | 4.10 | 0.67      | x, 1+y, z            |
|           | Cat...Ani   | C15-H15...O11  | 1.09 | 2.72 | 3.71 | 150  | 0.04 | 0.38 | 0.07 | 1.00      | x, 1+y, z            |
| Cat...Ani | C5-H5...O11 | 1.09           | 2.62 | 3.35 | 124  | 0.04 | 0.72 | 1.55 | 0.50 | x, 1+y, z |                      |
| 1k        | Cat...Ani   | O1-H1A...O5    | 0.99 | 1.68 | 2.67 | 176  | 0.32 | 2.35 | 0.00 | 1.26      | -x, 1+y, -1/2-z      |
|           | Wat...Ani   | O6-H6A...O4    | 0.99 | 1.73 | 2.69 | 162  | 0.3  | 2.49 | 0.03 | 1.23      | 1/2-x, 3/2-y, -1-z   |
|           | Wat...Ani   | O6-H6B...O5    | 0.99 | 1.74 | 2.71 | 166  | 0.29 | 2.56 | 0.01 | 1.18      | 1/2-x, 1/2-y, -1-z   |
|           | Cat...Wat   | N3-H3A...O6    | 1.01 | 1.79 | 2.80 | 172  | 0.27 | 2.42 | 0.03 | 1.15      | -x, 1+y, -1/2-z      |
|           | Cat...Ani   | O2-H2A...O4    | 0.99 | 1.79 | 2.74 | 158  | 0.25 | 1.87 | 0.06 | 1.24      | -x, y, -1/2-z        |
|           | Cat...Wat   | N3-H3B...O6    | 1.02 | 1.85 | 2.80 | 154  | 0.2  | 2.43 | 0.1  | 1.00      | x, 1-y, 1/2+z        |
|           | Cat...Cat   | C9-H9C...O1    | 1.09 | 2.64 | 3.05 | 101  | 0.05 | 0.81 | 0.55 | 0.75      | x, 1+y, +z           |
|           | Cat...Cat   | C9-H9C...O2    | 1.09 | 2.62 | 3.51 | 139  | 0.04 | 0.54 | 0.18 | 0.67      | -x, 1-y, -z          |
|           | Cat...Ani   | C5-H5...O5     | 1.09 | 2.69 | 3.42 | 124  | 0.04 | 0.58 | 0.62 | 0.67      | -x, 1+y, -1/2-z      |
|           | Cat...Ani   | C6-H6...O4     | 1.09 | 2.72 | 3.50 | 128  | 0.03 | 0.51 | 0.38 | 0.67      | -1/2+x, 3/2-y, 1/2+z |

Table S6 Comparison of atomic charge for the gas phase optimized cationic and neutral synephrine O-H...O dimers derived from ESPD and AIM charge schemes.

| Atom | ESPD Charges |         |         |         | AIM Charges |         |         |         |
|------|--------------|---------|---------|---------|-------------|---------|---------|---------|
|      | Charged      |         | Neutral |         | Charged     |         | Neutral |         |
|      | Dimer        | Monomer | Dimer   | Monomer | Dimer       | Monomer | Dimer   | Monomer |
| H1   | 0.45         | 0.45    | 0.45    | 0.43    | 0.61        | 0.60    | 0.59    | 0.58    |
| O2   | -0.66        | -0.61   | -0.71   | -0.64   | -1.17       | -1.13   | -1.15   | -1.13   |
| C3   | 0.38         | 0.45    | 0.38    | 0.43    | 0.49        | 0.56    | 0.47    | 0.51    |
| C4   | -0.24        | -0.32   | -0.22   | -0.30   | -0.01       | -0.01   | -0.03   | -0.03   |
| H5   | 0.16         | 0.16    | 0.11    | 0.13    | 0.05        | 0.04    | 0.01    | 0.01    |
| C6   | -0.18        | -0.13   | -0.23   | -0.14   | -0.01       | -0.02   | -0.01   | -0.02   |
| H7   | 0.17         | 0.16    | 0.17    | 0.15    | 0.04        | 0.04    | 0.04    | 0.05    |
| C8   | 0.14         | 0.08    | 0.11    | 0.07    | -0.03       | -0.05   | 0.04    | -0.03   |
| C9   | -0.20        | -0.17   | -0.19   | -0.17   | 0.00        | -0.01   | -0.01   | -0.02   |
| H10  | 0.13         | 0.12    | 0.11    | 0.12    | 0.04        | 0.03    | 0.02    | 0.02    |
| C11  | -0.11        | -0.20   | -0.12   | -0.22   | 0.01        | 0.01    | 0.00    | -0.01   |
| H12  | 0.13         | 0.18    | 0.12    | 0.16    | 0.06        | 0.08    | 0.05    | 0.05    |
| C13  | 0.11         | 0.04    | 0.20    | 0.03    | 0.54        | 0.52    | 0.53    | 0.52    |
| O14  | -0.66        | -0.63   | -0.70   | -0.62   | -1.17       | -1.15   | -1.15   | -1.12   |
| H15  | 0.48         | 0.43    | 0.49    | 0.39    | 0.64        | 0.61    | 0.61    | 0.57    |
| H16  | 0.07         | 0.10    | 0.02    | 0.07    | 0.01        | 0.02    | 0.00    | 0.01    |
| C17  | -0.23        | -0.07   | 0.13    | 0.31    | 0.28        | 0.27    | 0.38    | 0.38    |
| H18  | 0.13         | 0.09    | 0.03    | -0.01   | 0.07        | 0.08    | -0.02   | -0.01   |

Electronic supplementary information (ESI)

|     |       |       |       |       |       |       |       |       |
|-----|-------|-------|-------|-------|-------|-------|-------|-------|
| H19 | 0.12  | 0.09  | 0.00  | -0.01 | 0.08  | 0.08  | 0.00  | 0.00  |
| N20 | 0.21  | 0.12  | -0.71 | -0.76 | -1.02 | -1.02 | -1.03 | -1.03 |
| C21 | -0.29 | -0.28 | 0.23  | 0.16  | 0.29  | 0.29  | 0.36  | 0.36  |
| H22 | 0.17  | 0.17  | -0.03 | -0.02 | 0.09  | 0.08  | -0.03 | -0.02 |
| H23 | 0.16  | 0.15  | 0.02  | 0.03  | 0.08  | 0.08  | 0.00  | 0.00  |
| H24 | 0.14  | 0.14  | -0.01 | 0.02  | 0.09  | 0.09  | 0.01  | 0.01  |
| H25 | 0.45  | -     | 0.45  | -     | 0.61  | -     | 0.59  | -     |
| O26 | -0.66 | -     | -0.71 | -     | -1.17 | -     | -1.15 | -     |
| C27 | 0.38  | -     | 0.38  | -     | 0.49  | -     | 0.47  | -     |
| C28 | -0.24 | -     | -0.22 | -     | -0.01 | -     | -0.03 | -     |
| H29 | 0.16  | -     | 0.11  | -     | 0.05  | -     | 0.01  | -     |
| C30 | -0.18 | -     | -0.23 | -     | -0.01 | -     | -0.01 | -     |
| H31 | 0.17  | -     | 0.17  | -     | 0.04  | -     | 0.04  | -     |
| C32 | 0.14  | -     | 0.11  | -     | -0.03 | -     | -0.02 | -     |
| C33 | -0.20 | -     | -0.19 | -     | 0.00  | -     | -0.01 | -     |
| H34 | 0.13  | -     | 0.11  | -     | 0.04  | -     | 0.02  | -     |
| C35 | -0.11 | -     | -0.12 | -     | 0.01  | -     | 0.00  | -     |
| H36 | 0.13  | -     | 0.12  | -     | 0.06  | -     | 0.05  | -     |
| C37 | 0.11  | -     | 0.20  | -     | 0.54  | -     | 0.53  | -     |
| O38 | -0.66 | -     | -0.70 | -     | -1.17 | -     | -1.15 | -     |
| H39 | 0.48  | -     | 0.49  | -     | 0.64  | -     | 0.61  | -     |
| H40 | 0.07  | -     | 0.02  | -     | 0.01  | -     | 0.00  | -     |
| C41 | -0.23 | -     | 0.13  | -     | 0.28  | -     | 0.38  | -     |
| H42 | 0.12  | -     | 0.00  | -     | 0.08  | -     | 0.00  | -     |
| H43 | 0.13  | -     | 0.03  | -     | 0.07  | -     | -0.02 | -     |
| N44 | 0.21  | -     | -0.71 | -     | -1.02 | -     | -1.03 | -     |
| C45 | -0.29 | -     | 0.23  | -     | 0.29  | -     | 0.36  | -     |
| H46 | 0.16  | -     | 0.02  | -     | 0.08  | -     | 0.00  | -     |
| H47 | 0.14  | -     | -0.01 | -     | 0.09  | -     | 0.01  | -     |
| H48 | 0.17  | -     | -0.03 | -     | 0.09  | -     | -0.03 | -     |
| H49 | 0.21  | 0.24  | 0.35  | 0.37  | 0.48  | 0.48  | 0.36  | 0.36  |
| H50 | 0.22  | 0.23  | -     | -     | 0.43  | 0.43  | -     | -     |
| H51 | 0.22  | -     | -     | -     | 0.43  | -     | -     | -     |
| H52 | 0.21  | -     | 0.35  | -     | 0.48  | -     | 0.36  | -     |

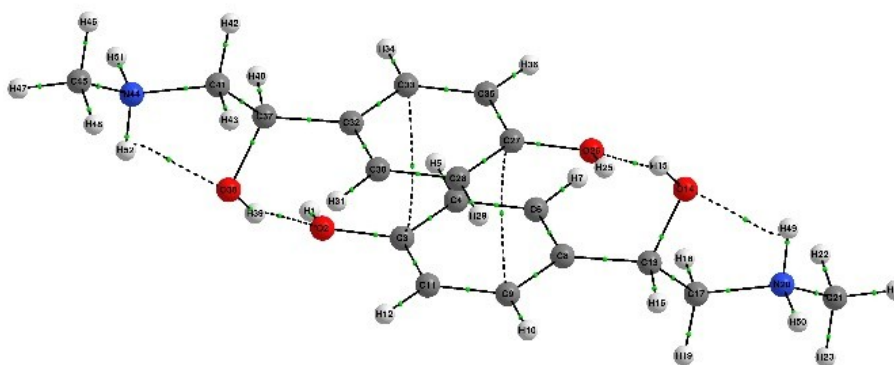

(a)



Electronic supplementary information (ESI)

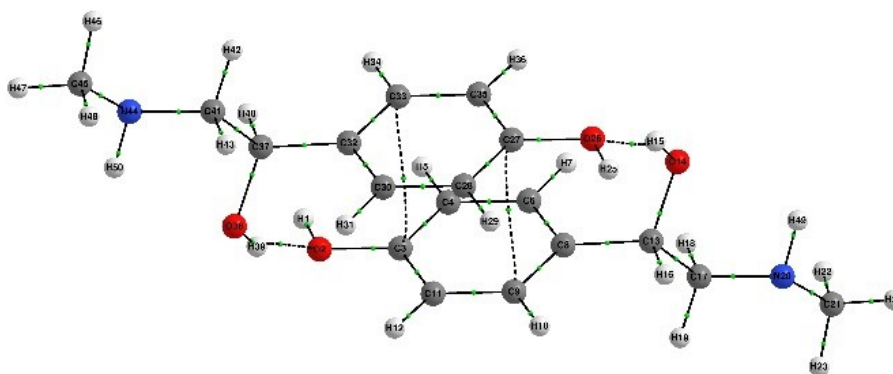

(b)

**Figure S2** Molecular graph depicting bond critical point (marked in green) observed for the gas phase optimized (a) cation···cation synephrine dimer (b) neutral···neutral synephrine O–H···O dimer (Synthon A).

**Table S7** Comparison of BCP properties for the intramolecular region of cationic (shown in red color) and neutral (*italicised*) synephrine O–H···O dimers obtained after gas-phase optimization.

| Bond           | $\rho$<br>(eÅ <sup>-3</sup> ) | $\nabla^2\rho$<br>(eÅ <sup>-5</sup> ) | $\epsilon$ | $R_{ij}$ (Å) | $d_1$ (Å) | $d_2$ (Å) |
|----------------|-------------------------------|---------------------------------------|------------|--------------|-----------|-----------|
| O2–H1          | 2.4297                        | -61.8852                              | 0.0223     | 0.9388       | 0.7784    | 0.1605    |
| <i>O2–H1</i>   | 2.4578                        | -62.0541                              | 0.0224     | 0.9372       | 0.7737    | 0.1635    |
| O14–H15        | 2.3496                        | -60.4455                              | 0.0214     | 0.9459       | 0.7919    | 0.1539    |
| <i>O14–H15</i> | 2.4234                        | -61.4708                              | 0.0233     | 0.941        | 0.7807    | 0.1602    |
| O26–H25        | 2.4297                        | -61.8852                              | 0.0223     | 0.9388       | 0.7784    | 0.1605    |
| <i>O26–H25</i> | 2.4578                        | -62.0541                              | 0.0224     | 0.9372       | 0.7737    | 0.1635    |
| O38–H39        | 2.3496                        | -60.4457                              | 0.0214     | 0.9459       | 0.7919    | 0.1539    |
| <i>O38–H39</i> | 2.4234                        | -61.4711                              | 0.0233     | 0.941        | 0.7807    | 0.1602    |
| N20–H50        | 2.2594                        | -40.7459                              | 0.0037     | 1.003        | 0.7604    | 0.2426    |
| <i>N20–H50</i> | –                             | –                                     | –          | –            | –         | –         |
| N20–H49        | 2.2124                        | -42.4127                              | 0.0029     | 1.0089       | 0.7775    | 0.2313    |
| <i>N20–H49</i> | 2.2854                        | -37.3992                              | 0.0483     | 0.9955       | 0.7401    | 0.2554    |
| N44–H51        | 2.2594                        | -40.746                               | 0.0037     | 1.003        | 0.7604    | 0.2426    |
| <i>N44–H51</i> | –                             | –                                     | –          | –            | –         | –         |
| N44–H52        | 2.2124                        | -42.4125                              | 0.0029     | 1.0089       | 0.7775    | 0.2313    |
| <i>N44–H50</i> | 2.2854                        | -37.3992                              | 0.0483     | 0.9955       | 0.7401    | 0.2554    |
| C3–C4          | 2.0898                        | -20.913                               | 0.2254     | 1.3927       | 0.7259    | 0.6669    |
| <i>C3–C4</i>   | 2.0897                        | -20.8397                              | 0.2343     | 1.3916       | 0.7254    | 0.6662    |
| C3–C11         | 2.1139                        | -21.5126                              | 0.2267     | 1.388        | 0.7268    | 0.6611    |
| <i>C3–C11</i>  | 2.1106                        | -21.4159                              | 0.2304     | 1.3879       | 0.7273    | 0.6607    |
| C4–C6          | 2.0771                        | -20.4528                              | 0.2064     | 1.3869       | 0.6947    | 0.6922    |
| <i>C4–C6</i>   | 2.0675                        | -20.2724                              | 0.2054     | 1.3888       | 0.7024    | 0.6864    |
| C6–C8          | 2.0536                        | -19.9641                              | 0.1973     | 1.3953       | 0.6978    | 0.6975    |
| <i>C6–C8</i>   | 2.061                         | -20.1426                              | 0.1906     | 1.3941       | 0.7031    | 0.691     |
| C8–C9          | 2.0653                        | -20.192                               | 0.2050     | 1.393        | 0.6983    | 0.6947    |
| <i>C8–C9</i>   | 2.069                         | -20.2922                              | 0.1984     | 1.3923       | 0.6899    | 0.7024    |
| C9–C11         | 2.0808                        | -20.6257                              | 0.1969     | 1.3873       | 0.6949    | 0.6924    |
| <i>C9–C11</i>  | 2.0751                        | -20.4943                              | 0.1995     | 1.3881       | 0.691     | 0.6971    |
| C4–H5          | 1.8804                        | -22.9222                              | 0.0187     | 1.0699       | 0.6943    | 0.3755    |
| <i>C4–H5</i>   | 1.8634                        | -22.4608                              | 0.0216     | 1.0713       | 0.6885    | 0.3828    |
| C6–H7          | 1.8915                        | -23.202                               | 0.0127     | 1.0698       | 0.6945    | 0.3753    |

Electronic supplementary information (ESI)

|                |               |                 |               |               |               |               |
|----------------|---------------|-----------------|---------------|---------------|---------------|---------------|
| <i>C6-H7</i>   | <i>1.894</i>  | <i>-23.2667</i> | <i>0.0133</i> | <i>1.0694</i> | <i>0.6951</i> | <i>0.3743</i> |
| <b>C9-H10</b>  | <b>1.8906</b> | <b>-23.2109</b> | <b>0.0126</b> | <b>1.0704</b> | <b>0.6951</b> | <b>0.3754</b> |
| <i>C9-H10</i>  | <i>1.8834</i> | <i>-23.0114</i> | <i>0.0138</i> | <i>1.071</i>  | <i>0.6921</i> | <i>0.3789</i> |
| <b>C11-H12</b> | <b>1.893</b>  | <b>-23.2848</b> | <b>0.0164</b> | <b>1.0681</b> | <b>0.6976</b> | <b>0.3705</b> |
| <i>C11-H12</i> | <i>1.8861</i> | <i>-23.0707</i> | <i>0.0177</i> | <i>1.0685</i> | <i>0.6943</i> | <i>0.3742</i> |
| <b>C13-H16</b> | <b>1.8896</b> | <b>-22.9258</b> | <b>0.0294</b> | <b>1.0847</b> | <b>0.7044</b> | <b>0.3804</b> |
| <i>C13-H16</i> | <i>1.8874</i> | <i>-22.8491</i> | <i>0.0306</i> | <i>1.0837</i> | <i>0.7016</i> | <i>0.3821</i> |
| <b>C17-H18</b> | <b>1.9101</b> | <b>-23.5553</b> | <b>0.0294</b> | <b>1.0756</b> | <b>0.7073</b> | <b>0.3683</b> |
| <i>C17-H18</i> | <i>1.823</i>  | <i>-21.2931</i> | <i>0.0230</i> | <i>1.0908</i> | <i>0.7006</i> | <i>0.3902</i> |
| <b>C17-H19</b> | <b>1.9107</b> | <b>-23.6665</b> | <b>0.0284</b> | <b>1.0746</b> | <b>0.7072</b> | <b>0.3674</b> |
| <i>C17-H19</i> | <i>1.8678</i> | <i>-22.5208</i> | <i>0.0229</i> | <i>1.0807</i> | <i>0.6959</i> | <i>0.3847</i> |
| <b>C21-H22</b> | <b>1.9122</b> | <b>-23.7362</b> | <b>0.0317</b> | <b>1.0726</b> | <b>0.7066</b> | <b>0.366</b>  |
| <i>C21-H22</i> | <i>1.8276</i> | <i>-21.4484</i> | <i>0.0268</i> | <i>1.0876</i> | <i>0.6965</i> | <i>0.3911</i> |
| <b>C21-H23</b> | <b>1.9113</b> | <b>-23.7177</b> | <b>0.0319</b> | <b>1.073</b>  | <b>0.7068</b> | <b>0.3663</b> |
| <i>C21-H23</i> | <i>1.8641</i> | <i>-22.4156</i> | <i>0.0273</i> | <i>1.079</i>  | <i>0.6936</i> | <i>0.3854</i> |
| <b>C21-H24</b> | <b>1.9129</b> | <b>-23.7813</b> | <b>0.0302</b> | <b>1.0727</b> | <b>0.708</b>  | <b>0.3647</b> |
| <i>C21-H24</i> | <i>1.8724</i> | <i>-22.6446</i> | <i>0.0255</i> | <i>1.0765</i> | <i>0.6929</i> | <i>0.3837</i> |
| <b>C28-H29</b> | <b>1.8804</b> | <b>-22.9222</b> | <b>0.0187</b> | <b>1.0699</b> | <b>0.6943</b> | <b>0.3755</b> |
| <i>C28-H29</i> | <i>1.8634</i> | <i>-22.4609</i> | <i>0.0216</i> | <i>1.0713</i> | <i>0.6885</i> | <i>0.3828</i> |
| <b>C30-H31</b> | <b>1.8915</b> | <b>-23.202</b>  | <b>0.0127</b> | <b>1.0698</b> | <b>0.6945</b> | <b>0.3753</b> |
| <i>C30-H31</i> | <i>1.894</i>  | <i>-23.2668</i> | <i>0.0133</i> | <i>1.0694</i> | <i>0.6951</i> | <i>0.3743</i> |
| <b>C33-H34</b> | <b>1.8906</b> | <b>-23.2109</b> | <b>0.0126</b> | <b>1.0704</b> | <b>0.6951</b> | <b>0.3754</b> |
| <i>C33-H34</i> | <i>1.8834</i> | <i>-23.0115</i> | <i>0.0138</i> | <i>1.071</i>  | <i>0.6921</i> | <i>0.3789</i> |
| <b>C35-H36</b> | <b>1.893</b>  | <b>-23.2847</b> | <b>0.0164</b> | <b>1.0681</b> | <b>0.6976</b> | <b>0.3705</b> |
| <i>C35-H36</i> | <i>1.8861</i> | <i>-23.0708</i> | <i>0.0177</i> | <i>1.0685</i> | <i>0.6943</i> | <i>0.3742</i> |
| <b>C37-H40</b> | <b>1.8896</b> | <b>-22.9257</b> | <b>0.0294</b> | <b>1.0847</b> | <b>0.7044</b> | <b>0.3804</b> |
| <i>C37-H40</i> | <i>1.8874</i> | <i>-22.849</i>  | <i>0.0306</i> | <i>1.0837</i> | <i>0.7016</i> | <i>0.3821</i> |
| <b>C41-H42</b> | <b>1.9107</b> | <b>-23.6665</b> | <b>0.0284</b> | <b>1.0746</b> | <b>0.7072</b> | <b>0.3674</b> |
| <i>C41-H42</i> | <i>1.8678</i> | <i>-22.521</i>  | <i>0.0229</i> | <i>1.0807</i> | <i>0.6959</i> | <i>0.3847</i> |
| <b>C41-H43</b> | <b>1.9101</b> | <b>-23.5553</b> | <b>0.0294</b> | <b>1.0756</b> | <b>0.7073</b> | <b>0.3683</b> |
| <i>C41-H43</i> | <i>1.823</i>  | <i>-21.2932</i> | <i>0.0230</i> | <i>1.0908</i> | <i>0.7006</i> | <i>0.3902</i> |
| <b>C45-H46</b> | <b>1.9113</b> | <b>-23.7177</b> | <b>0.0319</b> | <b>1.073</b>  | <b>0.7068</b> | <b>0.3663</b> |
| <i>C45-H46</i> | <i>1.8641</i> | <i>-22.4156</i> | <i>0.0273</i> | <i>1.079</i>  | <i>0.6936</i> | <i>0.3854</i> |
| <b>C45-H47</b> | <b>1.9129</b> | <b>-23.7813</b> | <b>0.0302</b> | <b>1.0727</b> | <b>0.708</b>  | <b>0.3647</b> |
| <i>C45-H47</i> | <i>1.8724</i> | <i>-22.6445</i> | <i>0.0255</i> | <i>1.0765</i> | <i>0.6929</i> | <i>0.3837</i> |
| <b>C45-H48</b> | <b>1.9122</b> | <b>-23.7362</b> | <b>0.0317</b> | <b>1.0726</b> | <b>0.7066</b> | <b>0.366</b>  |
| <i>C45-H48</i> | <i>1.8276</i> | <i>-21.4484</i> | <i>0.0268</i> | <i>1.0876</i> | <i>0.6965</i> | <i>0.3911</i> |
| <b>C8-C13</b>  | <b>1.7077</b> | <b>-14.567</b>  | <b>0.0419</b> | <b>1.5104</b> | <b>0.7388</b> | <b>0.7717</b> |
| <i>C8-C13</i>  | <i>1.7121</i> | <i>-14.6921</i> | <i>0.0491</i> | <i>1.5121</i> | <i>0.7639</i> | <i>0.7482</i> |
| <b>C13-C17</b> | <b>1.6855</b> | <b>-14.3751</b> | <b>0.0467</b> | <b>1.5268</b> | <b>0.7392</b> | <b>0.7875</b> |
| <i>C13-C17</i> | <i>1.7057</i> | <i>-14.6873</i> | <i>0.0261</i> | <i>1.5202</i> | <i>0.7695</i> | <i>0.7506</i> |
| <b>C27-C28</b> | <b>2.0898</b> | <b>-20.913</b>  | <b>0.2254</b> | <b>1.3927</b> | <b>0.7259</b> | <b>0.6669</b> |
| <i>C27-C28</i> | <i>2.0897</i> | <i>-20.8399</i> | <i>0.2343</i> | <i>1.3916</i> | <i>0.7254</i> | <i>0.6662</i> |
| <b>C27-C35</b> | <b>2.1139</b> | <b>-21.5126</b> | <b>0.2267</b> | <b>1.388</b>  | <b>0.7268</b> | <b>0.6611</b> |
| <i>C27-C35</i> | <i>2.1106</i> | <i>-21.416</i>  | <i>0.2304</i> | <i>1.3879</i> | <i>0.7273</i> | <i>0.6607</i> |
| <b>C28-C30</b> | <b>2.0771</b> | <b>-20.4528</b> | <b>0.2064</b> | <b>1.3869</b> | <b>0.6947</b> | <b>0.6922</b> |
| <i>C28-C30</i> | <i>2.0675</i> | <i>-20.2724</i> | <i>0.2054</i> | <i>1.3888</i> | <i>0.7024</i> | <i>0.6864</i> |
| <b>C30-C32</b> | <b>2.0536</b> | <b>-19.9641</b> | <b>0.1973</b> | <b>1.3953</b> | <b>0.6978</b> | <b>0.6975</b> |
| <i>C30-C32</i> | <i>2.061</i>  | <i>-20.1425</i> | <i>0.1906</i> | <i>1.3941</i> | <i>0.7031</i> | <i>0.691</i>  |
| <b>C32-C33</b> | <b>2.0653</b> | <b>-20.1919</b> | <b>0.2050</b> | <b>1.393</b>  | <b>0.6983</b> | <b>0.6947</b> |
| <i>C32-C33</i> | <i>2.069</i>  | <i>-20.2921</i> | <i>0.1984</i> | <i>1.3923</i> | <i>0.6899</i> | <i>0.7024</i> |
| <b>C32-C37</b> | <b>1.7076</b> | <b>-14.5669</b> | <b>0.0419</b> | <b>1.5104</b> | <b>0.7388</b> | <b>0.7717</b> |
| <i>C32-C37</i> | <i>1.7121</i> | <i>-14.6921</i> | <i>0.0491</i> | <i>1.5121</i> | <i>0.7639</i> | <i>0.7482</i> |
| <b>C33-C35</b> | <b>2.0808</b> | <b>-20.6257</b> | <b>0.1969</b> | <b>1.3873</b> | <b>0.6949</b> | <b>0.6924</b> |
| <i>C33-C35</i> | <i>2.0751</i> | <i>-20.4945</i> | <i>0.1995</i> | <i>1.3881</i> | <i>0.691</i>  | <i>0.6971</i> |

Electronic supplementary information (ESI)

|                |               |                 |               |               |               |               |
|----------------|---------------|-----------------|---------------|---------------|---------------|---------------|
| C37–C41        | 1.6855        | -14.375         | 0.0467        | 1.5268        | 0.7392        | 0.7875        |
| <i>C37–C41</i> | <i>1.7057</i> | <i>-14.6871</i> | <i>0.0261</i> | <i>1.5202</i> | <i>0.7695</i> | <i>0.7506</i> |
| C3–O2          | 1.842         | -5.2746         | 0.0710        | 1.3728        | 0.4583        | 0.9146        |
| <i>C3–O2</i>   | <i>1.8372</i> | <i>-5.0754</i>  | <i>0.0555</i> | <i>1.3738</i> | <i>0.4583</i> | <i>0.9155</i> |
| C13–O14        | 1.736         | -11.1074        | 0.0269        | 1.4182        | 0.4934        | 0.9248        |
| <i>C13–O14</i> | <i>1.7112</i> | <i>-10.354</i>  | <i>0.0068</i> | <i>1.4216</i> | <i>0.4921</i> | <i>0.9295</i> |
| C27–O26        | 1.842         | -5.2745         | 0.0710        | 1.3728        | 0.4583        | 0.9146        |
| <i>C27–O26</i> | <i>1.8371</i> | <i>-5.0753</i>  | <i>0.0555</i> | <i>1.3738</i> | <i>0.4583</i> | <i>0.9155</i> |
| C37–O38        | 1.736         | -11.1076        | 0.0269        | 1.4182        | 0.4934        | 0.9248        |
| <i>C37–O38</i> | <i>1.7112</i> | <i>-10.3533</i> | <i>0.0068</i> | <i>1.4216</i> | <i>0.4921</i> | <i>0.9295</i> |
| C17–N20        | 1.5533        | -12.1051        | 0.0106        | 1.5025        | 0.5546        | 0.9479        |
| <i>C17–N20</i> | <i>1.8268</i> | <i>-17.4475</i> | <i>0.0497</i> | <i>1.451</i>  | <i>0.5887</i> | <i>0.8623</i> |
| C21–N20        | 1.5582        | -11.708         | 0.0048        | 1.4946        | 0.5411        | 0.9536        |
| <i>C21–N20</i> | <i>1.7973</i> | <i>-16.9752</i> | <i>0.0421</i> | <i>1.454</i>  | <i>0.586</i>  | <i>0.868</i>  |
| C41–N44        | 1.5533        | -12.1051        | 0.0106        | 1.5025        | 0.5546        | 0.9479        |
| <i>C41–N44</i> | <i>1.8268</i> | <i>-17.4473</i> | <i>0.0497</i> | <i>1.451</i>  | <i>0.5887</i> | <i>0.8623</i> |
| N44–C45        | 1.5582        | -11.7079        | 0.0048        | 1.4946        | 0.9536        | 0.5411        |
| <i>N44–C45</i> | <i>1.7973</i> | <i>-16.9752</i> | <i>0.0421</i> | <i>1.454</i>  | <i>0.868</i>  | <i>0.586</i>  |

**Table S8** Comparison of BCP properties for the intermolecular region of cationic (shown in red color) and neutral (*italicised*) synephrine O–H···O dimers obtained after gas-phase optimization.

| Interaction          | $\rho$<br>(eÅ <sup>-3</sup> ) | $\nabla^2\rho$<br>(eÅ <sup>-5</sup> ) | $\epsilon$    | $R_{ij}$ (Å)  | $d_1$ (Å)     | $d_2$ (Å)     | $V_{cp}$<br>(kJmol <sup>-1</sup> Bohr <sup>-3</sup> ) | $G_{cp}$<br>(kJmol <sup>-1</sup> Bohr <sup>-3</sup> ) |
|----------------------|-------------------------------|---------------------------------------|---------------|---------------|---------------|---------------|-------------------------------------------------------|-------------------------------------------------------|
| N20–H49···O14        | 0.1577                        | 2.5663                                | 0.4749        | 2.1522        | 0.9005        | 1.2517        | -0.019                                                | 0.023                                                 |
| <i>N20–H49···O14</i> | -                             | -                                     | -             | -             | -             | -             | -                                                     | -                                                     |
| N44–H52···O38        | 0.1577                        | 2.5661                                | 0.4750        | 2.1523        | 0.9006        | 1.2517        | -0.019                                                | 0.023                                                 |
| <i>N44–H52···O38</i> | -                             | -                                     | -             | -             | -             | -             | -                                                     | -                                                     |
| O38–H39···O2         | 0.1649                        | 2.4157                                | 0.0802        | 1.9455        | 0.6956        | 1.2499        | -0.020                                                | 0.023                                                 |
| <i>O38–H39···O2</i>  | <i>0.1377</i>                 | <i>1.9823</i>                         | <i>0.0663</i> | <i>2.0431</i> | <i>0.7485</i> | <i>1.2946</i> | <i>-0.016</i>                                         | <i>0.018</i>                                          |
| O14–H15···O26        | 0.1649                        | 2.4157                                | 0.0802        | 1.9455        | 0.6956        | 1.2499        | -0.020                                                | 0.023                                                 |
| <i>O14–H15···O26</i> | <i>0.1378</i>                 | <i>1.9832</i>                         | <i>0.0664</i> | <i>2.0429</i> | <i>0.7484</i> | <i>1.2945</i> | <i>-0.016</i>                                         | <i>0.018</i>                                          |

**Table S9** NBO analysis depicting donor–acceptor delocalization for hydrogen bonds observed for the gas-phase optimized cationic (shown in red color) and neutral (*italicised*) synephrine O–H···O dimer.

| Interaction involved | Donor NBO (i)            | Population (n <sub>i</sub> ) | Acceptor NBO (j)                       | Population (n <sub>j</sub> ) | E <sup>2</sup> (kcal/mol) | E <sub>j</sub> –E <sub>i</sub> (a.u.) |
|----------------------|--------------------------|------------------------------|----------------------------------------|------------------------------|---------------------------|---------------------------------------|
| O38–H39···O2         | LP1 <sub>O2</sub>        | 1.97                         | $\sigma^*_{O38-H39}$                   | 0.02                         | 6.13                      | 1.21                                  |
| O38–H39···O2         | LP2 <sub>O2</sub>        | 1.90                         | $\sigma^*_{O38-H39}$                   | 0.02                         | 1.95                      | 0.95                                  |
| <i>O38–H39···O2</i>  | <i>LP1<sub>O2</sub></i>  | <i>1.97</i>                  | <i><math>\sigma^*_{O38-H39}</math></i> | <i>0.01</i>                  | <i>3.31</i>               | <i>1.25</i>                           |
| <i>O38–H39···O2</i>  | <i>LP2<sub>O2</sub></i>  | <i>1.90</i>                  | <i><math>\sigma^*_{O38-H39}</math></i> | <i>0.01</i>                  | <i>1.63</i>               | <i>0.96</i>                           |
| O14–H15···O26        | LP1 <sub>O26</sub>       | 1.97                         | $\sigma^*_{O14-H15}$                   | 0.02                         | 6.13                      | 1.21                                  |
| O14–H15···O26        | LP2 <sub>O26</sub>       | 1.90                         | $\sigma^*_{O14-H15}$                   | 0.02                         | 1.95                      | 0.95                                  |
| <i>O14–H15···O26</i> | <i>LP1<sub>O26</sub></i> | <i>1.97</i>                  | <i><math>\sigma^*_{O14-H15}</math></i> | <i>0.01</i>                  | <i>3.31</i>               | <i>1.25</i>                           |
| <i>O14–H15···O26</i> | <i>LP2<sub>O26</sub></i> | <i>1.90</i>                  | <i><math>\sigma^*_{O14-H15}</math></i> | <i>0.01</i>                  | <i>1.63</i>               | <i>0.96</i>                           |
| N20–H49···O14        | LP1 <sub>O14</sub>       | 1.97                         | $\sigma^*_{N20-H49}$                   | 0.02                         | 1.95                      | 1.07                                  |
| N20–H49···O14        | LP2 <sub>O14</sub>       | 1.95                         | $\sigma^*_{N20-H49}$                   | 0.02                         | 1.20                      | 0.78                                  |
| N44–H52···O38        | LP1 <sub>O38</sub>       | 1.97                         | $\sigma^*_{N44-H52}$                   | 0.02                         | 1.95                      | 1.07                                  |
| N44–H52···O38        | LP2 <sub>O38</sub>       | 1.95                         | $\sigma^*_{N44-H52}$                   | 0.02                         | 1.20                      | 0.78                                  |

Electronic supplementary information (ESI)

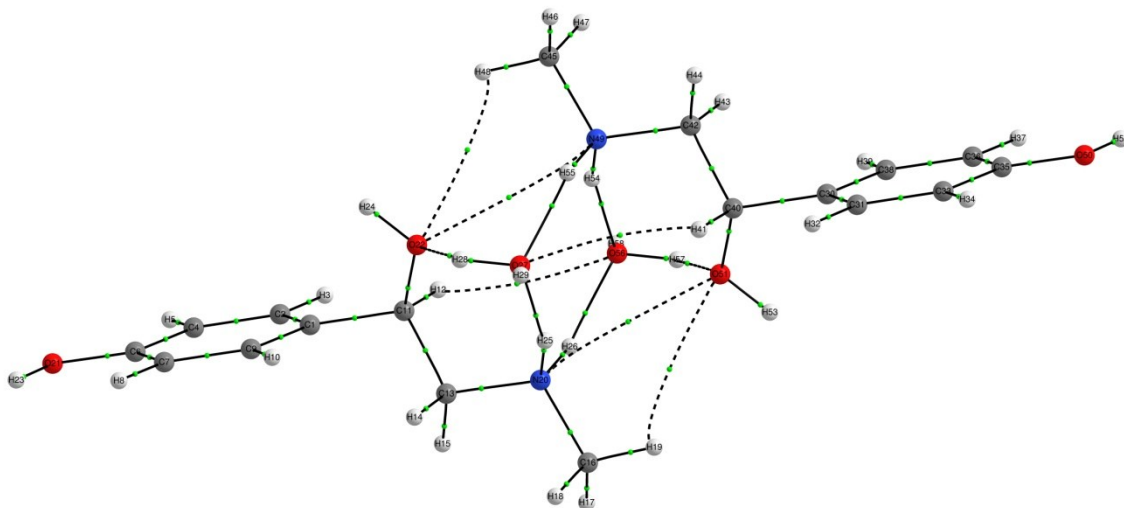

**Figure S3** Molecular graph depicting bond critical point (marked in green) observed for the gas phase optimized water mediated cation...cation complex observed in **1k**.

**Table S10** Intramolecular BCP properties of the water assisted tetramer observed in ( $\square$ ) synephrine-terephthalate salt (**1k**)

| Bond    | $\rho$ (eÅ <sup>-3</sup> ) | $\nabla^2\rho$ (eÅ <sup>-5</sup> ) | $\epsilon$ | $r_{ij}$ (Å) | $d_1$ (Å) | $d_2$ (Å) |
|---------|----------------------------|------------------------------------|------------|--------------|-----------|-----------|
| O21-H23 | 2.444                      | -62.436                            | 0.019      | 0.9383       | 0.1606    | 0.7777    |
| O50-H52 | 2.444                      | -62.435                            | 0.019      | 0.9383       | 0.1606    | 0.7777    |
| O22-H24 | 2.415                      | -61.161                            | 0.024      | 0.9412       | 0.1614    | 0.7798    |
| O51-H53 | 2.415                      | -61.153                            | 0.024      | 0.9412       | 0.1614    | 0.7798    |
| O56-H58 | 2.409                      | -61.416                            | 0.018      | 0.9390       | 0.1597    | 0.7793    |
| O27-H29 | 2.409                      | -61.418                            | 0.018      | 0.9390       | 0.1597    | 0.7793    |
| O56-H57 | 2.358                      | -60.572                            | 0.021      | 0.9443       | 0.1547    | 0.7896    |
| O27-H28 | 2.357                      | -60.569                            | 0.021      | 0.9443       | 0.1547    | 0.7896    |
| N20-H25 | 2.198                      | -41.725                            | 0.003      | 1.0108       | 0.2321    | 0.7786    |
| N49-H54 | 2.198                      | -41.714                            | 0.003      | 1.0108       | 0.2321    | 0.7787    |
| N20-H26 | 2.195                      | -41.691                            | 0.004      | 1.0111       | 0.232     | 0.7791    |
| N49-H55 | 2.195                      | -41.689                            | 0.004      | 1.0111       | 0.2319    | 0.7792    |
| C2-C4   | 2.103                      | -20.995                            | 0.211      | 1.3822       | 0.7009    | 0.6813    |
| C31-C33 | 2.103                      | -20.994                            | 0.211      | 1.3822       | 0.7009    | 0.6813    |
| C4-C6   | 2.088                      | -21.160                            | 0.206      | 1.3974       | 0.6694    | 0.7280    |
| C33-C35 | 2.088                      | -21.160                            | 0.206      | 1.3974       | 0.6694    | 0.7280    |
| C7-C9   | 2.081                      | -20.497                            | 0.214      | 1.3857       | 0.6851    | 0.7006    |
| C36-C38 | 2.081                      | -20.495                            | 0.214      | 1.3857       | 0.6851    | 0.7006    |
| C6-C7   | 2.075                      | -20.672                            | 0.213      | 1.3984       | 0.7232    | 0.6751    |
| C35-C36 | 2.075                      | -20.675                            | 0.213      | 1.3983       | 0.7232    | 0.6751    |
| C30-C31 | 2.044                      | -19.765                            | 0.207      | 1.3974       | 0.7065    | 0.6909    |
| C1-C2   | 2.043                      | -19.760                            | 0.207      | 1.3975       | 0.7065    | 0.6909    |
| C1-C9   | 2.039                      | -19.576                            | 0.211      | 1.3976       | 0.7008    | 0.6968    |
| C30-C38 | 2.039                      | -19.577                            | 0.211      | 1.3976       | 0.7008    | 0.6968    |
| C6-O21  | 2.013                      | -6.183                             | 0.050      | 1.3406       | 0.8918    | 0.4488    |
| C35-O50 | 2.013                      | -6.182                             | 0.050      | 1.3406       | 0.8918    | 0.4488    |
| C13-H15 | 1.909                      | -23.602                            | 0.028      | 1.0757       | 0.3669    | 0.7087    |
| C16-H17 | 1.909                      | -23.620                            | 0.031      | 1.0732       | 0.3672    | 0.7060    |
| C16-H19 | 1.909                      | -23.612                            | 0.030      | 1.0723       | 0.3681    | 0.7042    |
| C42-H44 | 1.909                      | -23.600                            | 0.028      | 1.0757       | 0.3670    | 0.7087    |
| C45-H46 | 1.909                      | -23.619                            | 0.031      | 1.0732       | 0.3672    | 0.7060    |

Electronic supplementary information (ESI)

|         |       |         |       |        |        |        |
|---------|-------|---------|-------|--------|--------|--------|
| C45–H48 | 1.909 | -23.610 | 0.030 | 1.0723 | 0.3681 | 0.7042 |
| C16–H18 | 1.907 | -23.581 | 0.031 | 1.0735 | 0.3675 | 0.7060 |
| C45–H47 | 1.907 | -23.581 | 0.031 | 1.0735 | 0.3675 | 0.7060 |
| C4–H5   | 1.906 | -23.639 | 0.016 | 1.0669 | 0.3655 | 0.7014 |
| C11–H12 | 1.906 | -23.336 | 0.036 | 1.0818 | 0.3771 | 0.7047 |
| C33–H34 | 1.906 | -23.639 | 0.016 | 1.0669 | 0.3655 | 0.7014 |
| C40–H41 | 1.906 | -23.335 | 0.036 | 1.0818 | 0.3771 | 0.7047 |
| C13–H14 | 1.899 | -23.283 | 0.031 | 1.0770 | 0.3701 | 0.7069 |
| C42–H43 | 1.899 | -23.281 | 0.532 | 1.0770 | 0.3701 | 0.7069 |
| C2–H3   | 1.890 | -23.182 | 0.013 | 1.0702 | 0.3767 | 0.6935 |
| C31–H32 | 1.890 | -23.182 | 0.013 | 1.0702 | 0.3767 | 0.6935 |
| C7–H8   | 1.887 | -23.077 | 0.019 | 1.0691 | 0.3740 | 0.6951 |
| C36–H37 | 1.887 | -23.077 | 0.019 | 1.0691 | 0.3740 | 0.6951 |
| C9–H10  | 1.878 | -22.846 | 0.014 | 1.0713 | 0.3802 | 0.6911 |
| C38–H39 | 1.878 | -22.845 | 0.014 | 1.0713 | 0.3802 | 0.6911 |
| C1–C11  | 1.724 | -14.810 | 0.054 | 1.5024 | 0.7162 | 0.7862 |
| C30–C40 | 1.724 | -14.807 | 0.054 | 1.5025 | 0.7163 | 0.7862 |
| C11–C13 | 1.702 | -14.622 | 0.040 | 1.5215 | 0.7423 | 0.7791 |
| C40–C42 | 1.702 | -14.614 | 0.040 | 1.5216 | 0.7424 | 0.7792 |
| C11–O22 | 1.593 | -8.851  | 0.032 | 1.4468 | 0.9450 | 0.5018 |
| C40–O51 | 1.593 | -8.846  | 0.032 | 1.4467 | 0.9450 | 0.5017 |
| C16–N20 | 1.581 | -12.519 | 0.008 | 1.4917 | 0.9438 | 0.5479 |
| C45–N49 | 1.581 | -12.523 | 0.008 | 1.4917 | 0.9438 | 0.5480 |
| C13–N20 | 1.570 | -12.652 | 0.023 | 1.4998 | 0.9407 | 0.5591 |
| C42–N49 | 1.570 | -12.658 | 0.023 | 1.4998 | 0.9406 | 0.5591 |

**Table S11** Intermolecular BCP properties of the water assisted tetramer observed in (□) synephrine–terephthalate salt (**1k**).

| Bond          | $\rho$<br>( $e\text{\AA}^{-3}$ ) | $\nabla^2\rho$<br>( $e\text{\AA}^{-5}$ ) | $\varepsilon$ | $r_{ij}$ (Å) | $d_1$ (Å) | $d_2$ (Å) | Vcp (kJ/mol/Bohr <sup>3</sup> ) | Gcp (kJ/mol/Bohr <sup>3</sup> ) |
|---------------|----------------------------------|------------------------------------------|---------------|--------------|-----------|-----------|---------------------------------|---------------------------------|
| N20–H26...O56 | 0.177                            | 2.427                                    | 0.067         | 1.9434       | 1.2457    | 0.6977    | -0.021                          | 0.023                           |
| N49–H55...O27 | 0.177                            | 2.438                                    | 0.066         | 1.9412       | 1.2446    | 0.6966    | -0.021                          | 0.023                           |
| N49–H54...O56 | 0.174                            | 2.397                                    | 0.049         | 1.9480       | 1.2482    | 0.6999    | -0.020                          | 0.023                           |
| N20–H25...O27 | 0.173                            | 2.387                                    | 0.049         | 1.9499       | 1.2491    | 0.7008    | -0.020                          | 0.022                           |
| O27–H28...O22 | 0.156                            | 2.316                                    | 0.142         | 2.0484       | 1.2731    | 0.7754    | -0.019                          | 0.022                           |
| O56–H57...O51 | 0.156                            | 2.315                                    | 0.142         | 2.0484       | 1.2732    | 0.7752    | -0.019                          | 0.022                           |
| O22...N49     | 0.042                            | 0.581                                    | 1.867         | 3.3409       | 1.6276    | 1.7133    | -0.004                          | 0.005                           |
| O51...N20     | 0.042                            | 0.579                                    | 1.863         | 3.3401       | 1.6284    | 1.7118    | -0.004                          | 0.005                           |
| C11–H12...O56 | 0.037                            | 0.460                                    | 1.654         | 2.9182       | 1.6385    | 1.2797    | -0.003                          | 0.004                           |
| C40–H41...O27 | 0.037                            | 0.460                                    | 1.767         | 2.9202       | 1.6392    | 1.2810    | -0.003                          | 0.004                           |
| C45–H48...O22 | 0.034                            | 0.421                                    | 0.918         | 2.9538       | 1.6666    | 1.2872    | -0.003                          | 0.004                           |
| C16–H19...O51 | 0.034                            | 0.420                                    | 0.924         | 2.9558       | 1.6676    | 1.2882    | -0.003                          | 0.004                           |

**Table S12** NBO analysis depicting donor–acceptor delocalization for hydrogen bonds (water-mediated N–H...O and cationic synephrine C–H...O dimer) observed for the gas-phase optimized tetramer.

| Interactions involved | Donor NBO (i)            | Population ( $n_i$ ) | Acceptor NBO (j)                               | Population ( $n_j$ ) | $E^2$ (kcal/mol) | $E(j)-E(i)$ a.u. |
|-----------------------|--------------------------|----------------------|------------------------------------------------|----------------------|------------------|------------------|
| O27–H28...O22         | LP1 <sub>O22</sub>       | 1.978                | $\sigma^*$ <sub>O27–H28</sub>                  | 0.009                | 1.51             | 1.21             |
| O27–H28...O22         | LP2 <sub>O22</sub>       | 1.961                | $\sigma^*$ <sub>O27–H28</sub>                  | 0.009                | 2.56             | 0.91             |
| N49–H54...O22         | LP1 <sub>O22</sub>       | 1.978                | $\sigma^*$ <sub>N49–H54</sub>                  | 0.035                | 0.06             | 1.12             |
| N49–H55...O22         | LP1 <sub>O22</sub>       | 1.978                | $\sigma^*$ <sub>N49–H55</sub>                  | 0.036                | 0.17             | 1.12             |
| <b>C45–H48...O22</b>  | <b>LP2<sub>O22</sub></b> | <b>1.961</b>         | <b><math>\sigma^*</math><sub>C45–H48</sub></b> | <b>0.004</b>         | <b>0.10</b>      | <b>0.88</b>      |
| N20–H25...O27         | LP1 <sub>O27</sub>       | 1.978                | $\sigma^*$ <sub>N20–H25</sub>                  | 0.035                | 4.99             | 0.83             |
| N20–H25...O27         | LP2 <sub>O27</sub>       | 1.973                | $\sigma^*$ <sub>N20–H25</sub>                  | 0.035                | 6.74             | 1.17             |

## Electronic supplementary information (ESI)

|                      |                          |              |                                      |              |             |             |
|----------------------|--------------------------|--------------|--------------------------------------|--------------|-------------|-------------|
| N49-H55...O27        | LP1 <sub>O27</sub>       | 1.978        | $\sigma^*$ N49-H55                   | 0.036        | 4.62        | 0.83        |
| N49-H55...O27        | LP2 <sub>O27</sub>       | 1.973        | $\sigma^*$ N49-H55                   | 0.036        | 7.33        | 1.17        |
| C40-H41...O27        | LP2 <sub>O27</sub>       | 1.973        | $\sigma^*$ C40-H41                   | 0.031        | 0.16        | 1.22        |
| N20-H26...O51        | LP1 <sub>O51</sub>       | 1.978        | $\sigma^*$ N20-H26                   | 0.036        | 0.17        | 1.12        |
| <b>C16-H19...O51</b> | <b>LP2<sub>O51</sub></b> | <b>1.961</b> | <b><math>\sigma^*</math> C16-H19</b> | <b>0.004</b> | <b>0.10</b> | <b>0.88</b> |
| O56-H57...O51        | LP1 <sub>O51</sub>       | 1.978        | $\sigma^*$ O56-H57                   | 0.009        | 1.51        | 1.21        |
| O56-H57...O51        | LP2 <sub>O51</sub>       | 1.961        | $\sigma^*$ O56-H57                   | 0.009        | 2.56        | 0.91        |
| N20-H26...O56        | LP1 <sub>O56</sub>       | 1.978        | $\sigma^*$ N20-H26                   | 0.036        | 5.12        | 0.83        |
| N20-H26...O56        | LP2 <sub>O56</sub>       | 1.973        | $\sigma^*$ N20-H26                   | 0.036        | 6.85        | 1.17        |
| C11-H12...O56        | LP2 <sub>O56</sub>       | 1.973        | $\sigma^*$ C11-H12                   | 0.031        | 0.16        | 1.22        |
| N49-H54...O56        | LP1 <sub>O56</sub>       | 1.978        | $\sigma^*$ N49-H54                   | 0.035        | 4.52        | 0.83        |
| N49-H54...O56        | LP2 <sub>O56</sub>       | 1.973        | $\sigma^*$ N49-H54                   | 0.035        | 7.15        | 1.17        |

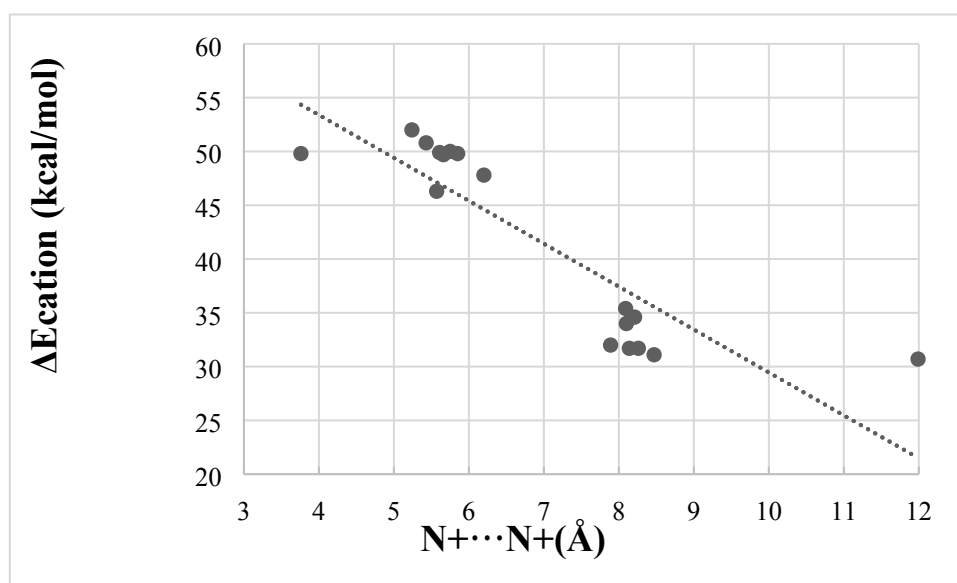

**Figure S4** Variation of inter-cationic columbic repulsion estimated from  $\Delta E_{\text{cation}}$  interaction energy vs distance between cationic charge centres

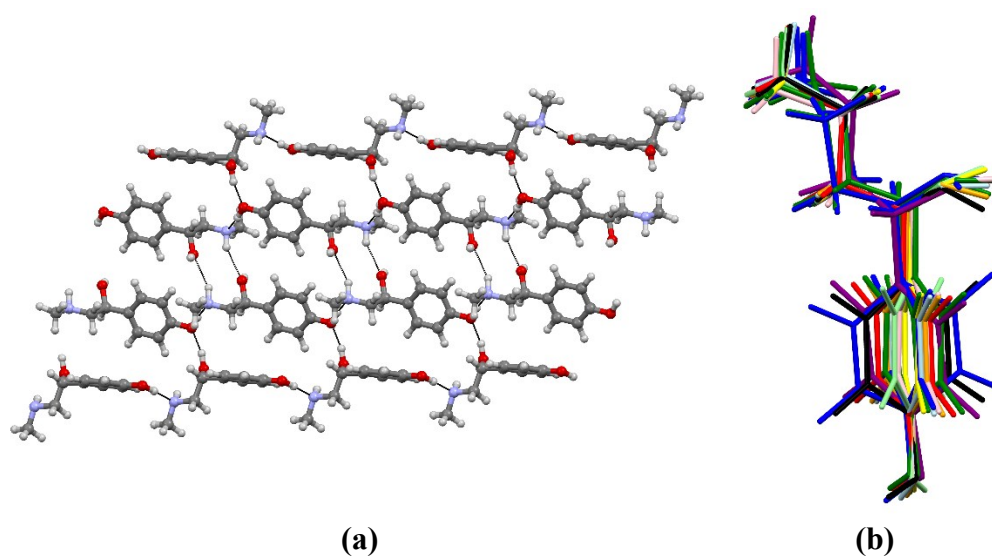



Electronic supplementary information (ESI)

**Figure S5** (a) Molecular packing in, **1a** (b) Molecular overlay of synephrine cation conformations in reported salt forms.

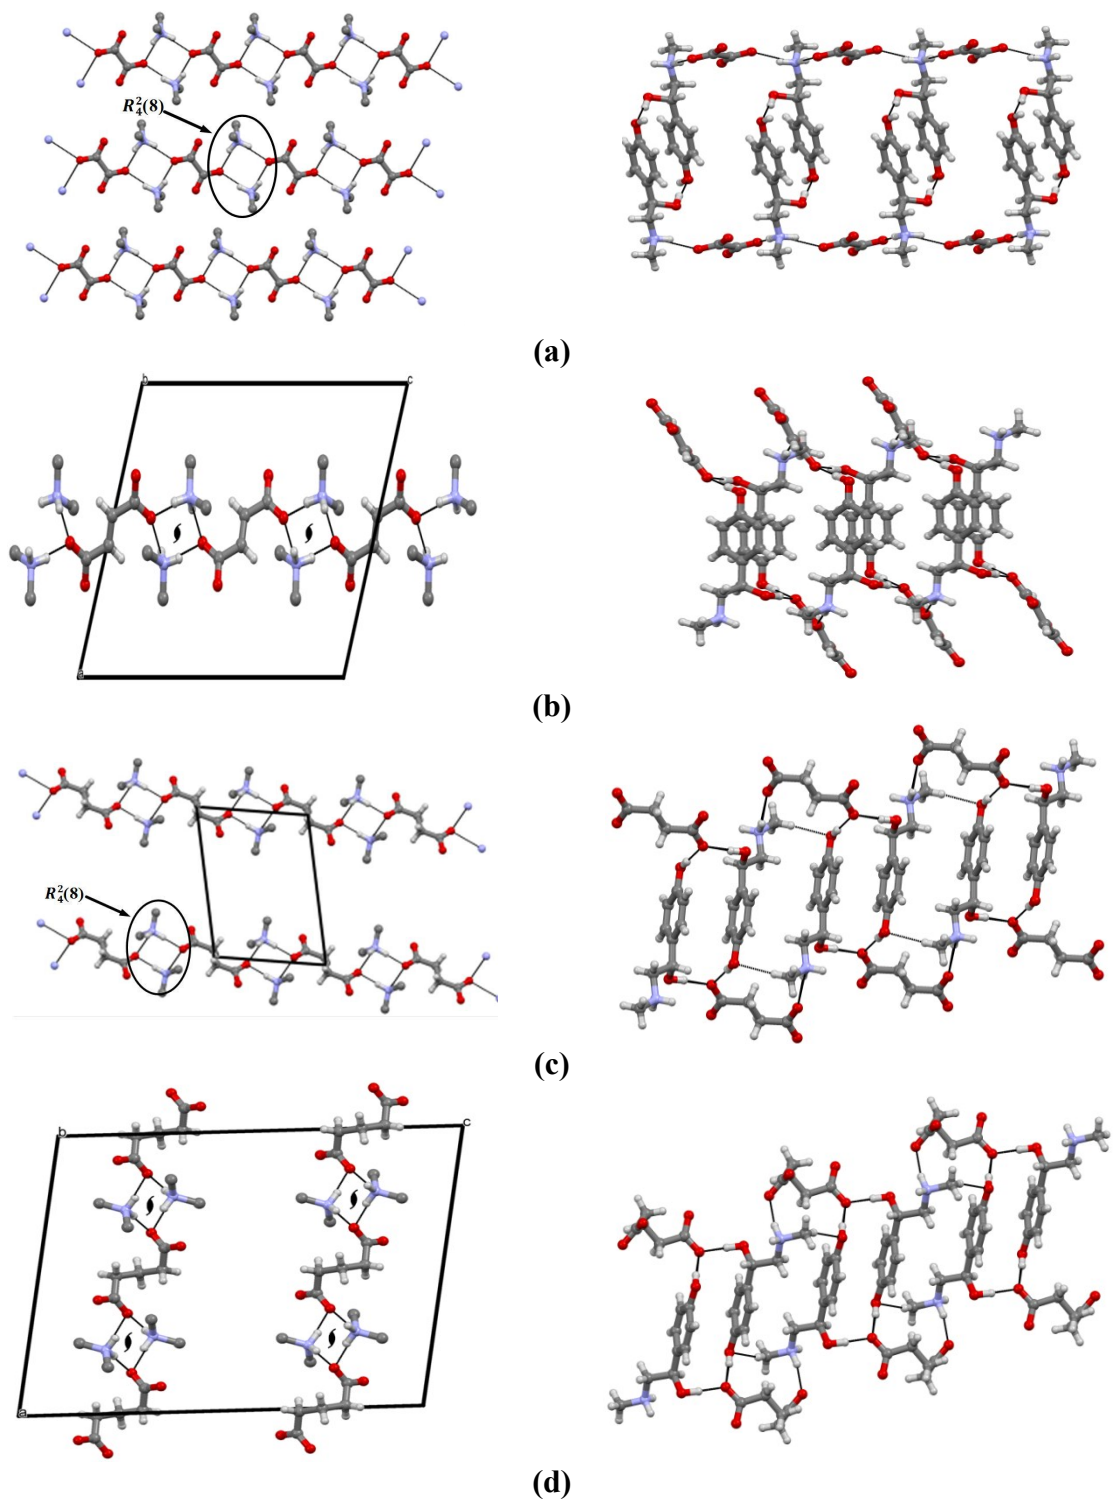

Electronic supplementary information (ESI)

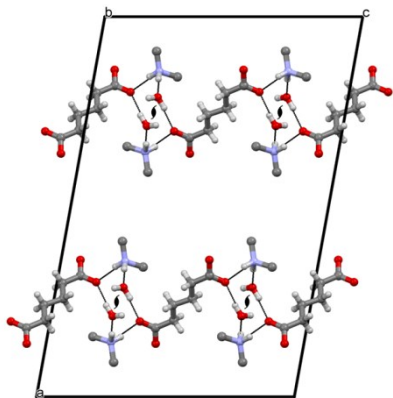

(e)

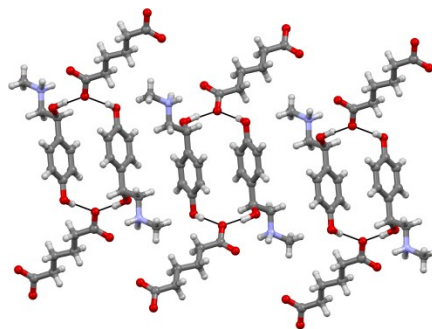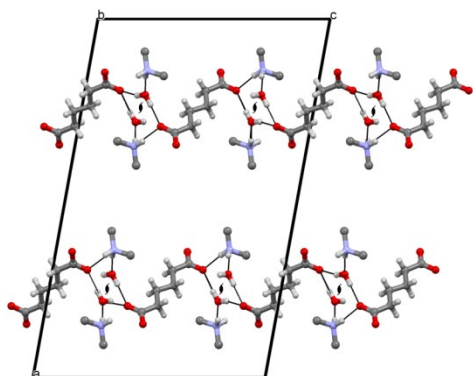

(f)

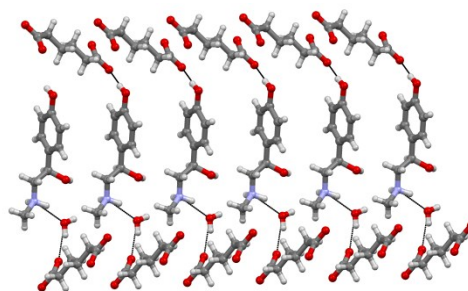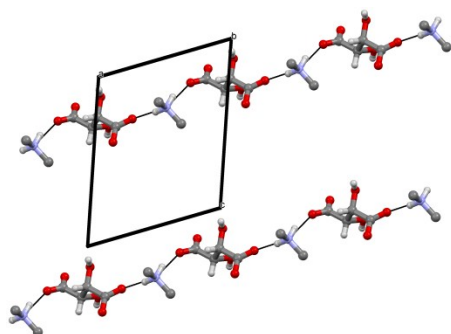

(g)

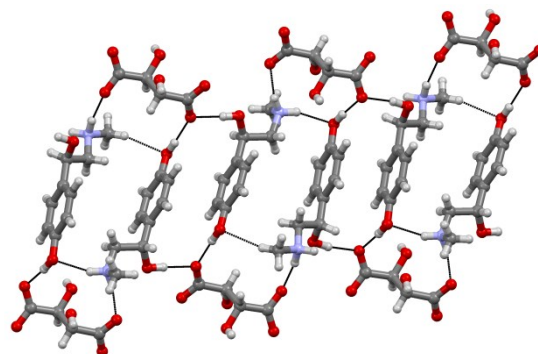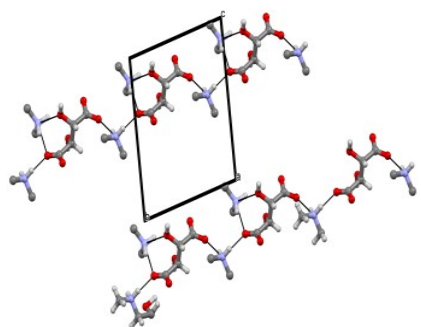

(h)

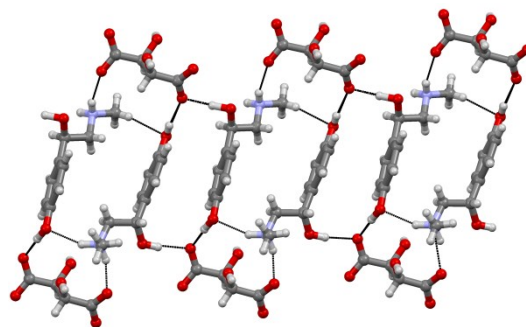



Electronic supplementary information (ESI)

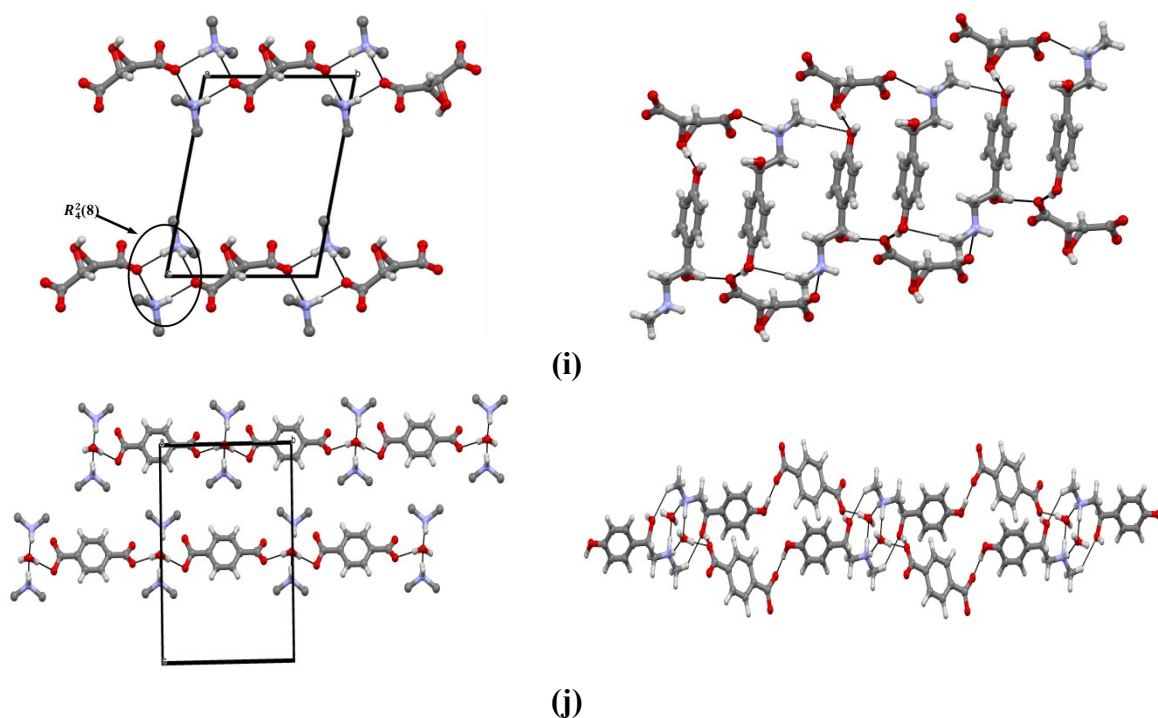

**Figure S6** Crystal packing in (a) oxalate salt, **1b** (b) fumarate salt, **1c** (c) succinate salt, **1d** (d) glutarate salt, **1e** (e) adipate salt at RT, **1f** (f) adipate salt at 100 K, **1g** (g) D,L-tartrate salt, **1h** (h) L-tartrate salt, **1i** (i) D,L-maleate salt, **1j** and (j) terephthalate salt, **1k**. Symbol  $\square$  represents the top view of the  $2_1$ -screw axis related molecular propagation.
